# Supplementary material for: Impact of rescanning and repositioning on radiomic features employing a multi-object phantom in magnetic resonance imaging
Source: Springer Nature journal article supplement (doi:10.1038/s41598-021-93756-x), 2021-07-09
Supplement: MOESM1 [file 41598_2021_93756_MOESM1_ESM.pdf]

# Supplementary Figure 1: Measurements of reproducibility and robustness for each feature and MRI sequence

A

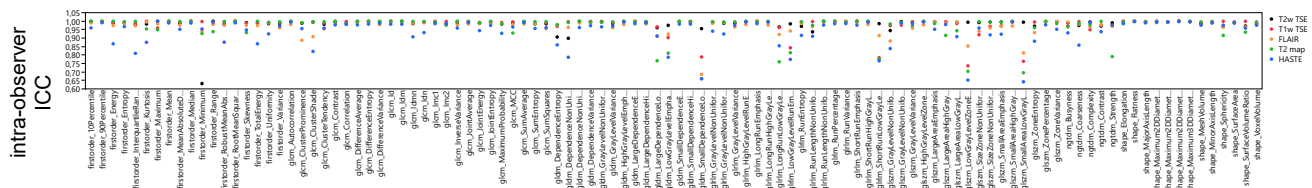

B

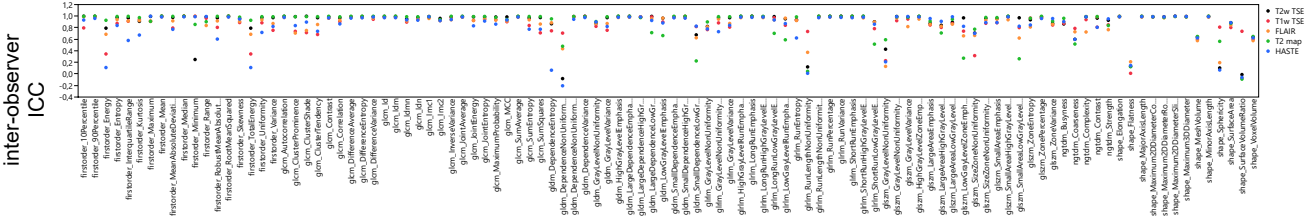

C

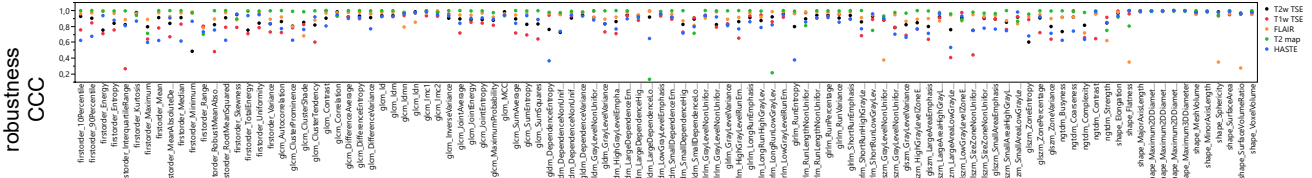

D

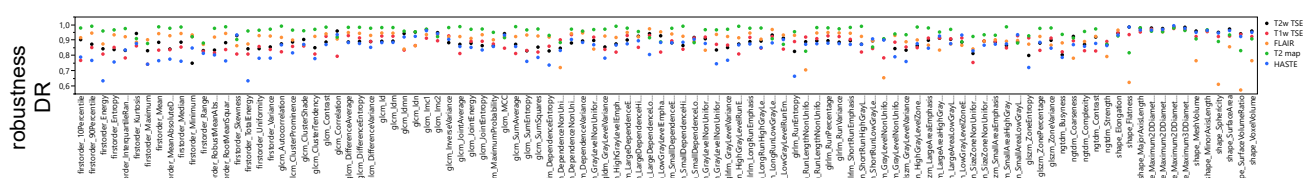

We depict comprehensive raw data of measurements of reproducibility (ICC, intraclass correlation coefficient) for intra- (A) and inter- (B) observer analysis and measurements of robustness (CCC, concordance correlation coefficient, C; DR, dynamic range, D). Each feature can be put into exact context of the measured values to estimate its validity. Colored dots depict the respective MRI sequence: T2w TSE, black; T1w TSE, red; FLAIR, orange; T2 map, green; HASTE, blue. Raw data values are in supplementary table 1.
