# Supplementary material for: Impact of rescanning and repositioning on radiomic features employing a multi-object phantom in magnetic resonance imaging
Source: Sci Rep. 2021 Jul 9;11:14248. doi: 10.1038/s41598-021-93756-x (PMC8271025; doi:10.1038/s41598-021-93756-x)
Supplement: Supplementary file 4 — Supplementary Table 1. [file 41598_2021_93756_MOESM4_ESM.xls]

## Sheet: Robustness
Features	T2w_TSE_CCC	T2w_TSE_DR	T2w_TSE	T1w_TSE_CCC	T1w_TSE_DR	T1w_TSE	FLAIR_CCC	FLAIR_DR	FLAIR	T2_map_CCC	T2_map_DR	T2_map	HASTE_CCC	HASTE_DR	HASTE
shape_VoxelVolume	0.979981	0.959051	0.95	0.954778	0.923056	0.9	0.952264	0.766138		0.998104	0.907871	0.9	0.97466	0.950404	0.95
shape_Maximum3DDiameter	0.997682	0.983334	0.95	0.996717	0.96596	0.95	0.998558	0.972072	0.95	0.992053	0.962517	0.95	0.996176	0.975987	0.95
shape_MeshVolume	0.979953	0.959045	0.95	0.954876	0.923162	0.9	0.952299	0.766029		0.998057	0.907708	0.9	0.974655	0.950399	0.95
shape_MajorAxisLength	0.992377	0.97755	0.95	0.982639	0.952546	0.95	0.995668	0.964346	0.95	0.997934	0.979814	0.95	0.991409	0.965148	0.95
shape_Sphericity	0.983868	0.95042	0.95	0.931618	0.923198	0.9	0.352184	0.612712		0.940594	0.89093	0.85	0.97633	0.946175	0.9
shape_Elongation	0.963817	0.945853	0.9	0.992712	0.948719	0.9	0.97717	0.964897	0.95	0.916921	0.926855	0.9	0.930719	0.932844	0.9
shape_SurfaceVolumeRatio	0.966392	0.941216	0.9	0.954999	0.936457	0.9	0.278434	0.575799		0.957658	0.831587		0.95589	0.923262	0.9
shape_Maximum2DDiameterSlice	0.99786	0.985103	0.95	0.999564	0.975163	0.95	0.99811	0.988236	0.95	0.993835	0.978222	0.95	0.99991	0.993465	0.95
shape_Flatness	0.997887	0.984741	0.95	0.958265	0.935714	0.9	0.352263	0.625146		0.804306	0.8177		0.997913	0.984794	0.95
shape_SurfaceArea	0.990083	0.971895	0.95	0.946941	0.926071	0.9	0.961179	0.856471	0.85	0.997564	0.933739	0.9	0.987587	0.962262	0.95
shape_MinorAxisLength	0.987491	0.961795	0.95	0.983251	0.955133	0.95	0.994443	0.961088	0.95	0.992074	0.966967	0.95	0.98722	0.962731	0.95
shape_Maximum2DDiameterColumn	0.995313	0.978511	0.95	0.997219	0.971403	0.95	0.995917	0.965169	0.95	0.988371	0.957575	0.95	0.992202	0.964986	0.95
shape_Maximum2DDiameterRow	0.995261	0.975185	0.95	0.988261	0.966395	0.95	0.988972	0.954015	0.95	0.992099	0.953957	0.95	0.993559	0.969344	0.95
gldm_GrayLevelVariance	0.832635	0.855383		0.731242	0.839484		0.891067	0.926162	0.85	0.996049	0.970967	0.95	0.83402	0.782841
gldm_HighGrayLevelEmphasis	0.861005	0.875256	0.85	0.709661	0.821921		0.917268	0.917081	0.9	0.998718	0.990018	0.95	0.768088	0.867468
gldm_DependenceEntropy	0.762052	0.829565		0.940587	0.860169	0.85	0.963371	0.919797	0.9	0.97686	0.930693	0.9	0.367794	0.737724
gldm_DependenceNonUniformity	0.725103	0.847404		0.954451	0.901841	0.9	0.947258	0.721618		0.972891	0.884154	0.85	0.737967	0.832866
gldm_GrayLevelNonUniformity	0.91192	0.897598	0.85	0.993283	0.919131	0.9	0.914004	0.841705		0.996722	0.96844	0.95	0.880653	0.869741	0.85
gldm_SmallDependenceEmphasis	0.911341	0.882232	0.85	0.890864	0.895164	0.85	0.956064	0.939769	0.9	0.996185	0.976846	0.95	0.917522	0.882505	0.85
gldm_SmallDependenceHighGrayLevelEmphasis	0.825739	0.864569		0.727748	0.840586		0.870108	0.924766	0.85	0.997855	0.990267	0.95	0.716252	0.886076
gldm_DependenceNonUniformityNormalized	0.904903	0.881157	0.85	0.931582	0.935374	0.9	0.971021	0.942146	0.9	0.989914	0.971106	0.95	0.942445	0.904218	0.9
gldm_LargeDependenceEmphasis	0.942056	0.900849	0.9	0.933281	0.929986	0.9	0.976886	0.949799	0.9	0.996045	0.977687	0.95	0.895292	0.875795	0.85
gldm_LargeDependenceLowGrayLevelEmphasis	0.917074	0.941831	0.9	0.993127	0.929859	0.9	0.991827	0.97334	0.95	0.136283	0.915193		0.648039	0.806379
gldm_DependenceVariance	0.941718	0.894332	0.85	0.976812	0.955663	0.95	0.97733	0.946419	0.9	0.980742	0.958321	0.95	0.930056	0.88511	0.85
gldm_LargeDependenceHighGrayLevelEmphasis	0.937104	0.925157	0.9	0.876562	0.852918	0.85	0.94484	0.921233	0.9	0.910639	0.955692	0.9	0.919004	0.895607	0.85
gldm_SmallDependenceLowGrayLevelEmphasis	0.891533	0.917144	0.85	0.909127	0.913824	0.9	0.812454	0.891024		0.714055	0.883592		0.796401	0.904945
gldm_LowGrayLevelEmphasis	0.9505	0.927894	0.9	0.931197	0.822192		0.980722	0.953571	0.95	0.987894	0.888249	0.85	0.954386	0.884762	0.85
glcm_JointAverage	0.894156	0.872653	0.85	0.717318	0.812906		0.942938	0.922948	0.9	0.998685	0.987459	0.95	0.839238	0.858444
glcm_SumAverage	0.894156	0.872653	0.85	0.717318	0.812906		0.942938	0.922948	0.9	0.998685	0.987459	0.95	0.839238	0.858444
glcm_JointEntropy	0.885355	0.863916	0.85	0.841308	0.892404		0.967893	0.934949	0.9	0.995863	0.971964	0.95	0.90744	0.835958
glcm_ClusterShade	0.8511	0.904016	0.85	0.823506	0.861642		0.681652	0.870233		0.983974	0.960632	0.95	0.761316	0.871706
glcm_MaximumProbability	0.877178	0.862865	0.85	0.815079	0.874782		0.917932	0.901946	0.9	0.973167	0.950347	0.95	0.889578	0.858574	0.85
glcm_Idmn	0.971396	0.942623	0.9	0.936599	0.834797		0.792788	0.841597		0.977085	0.958085	0.95	0.958242	0.920255	0.9
glcm_JointEnergy	0.884346	0.879384	0.85	0.853124	0.892297	0.85	0.94239	0.91117	0.9	0.994722	0.970353	0.95	0.901827	0.852668	0.85
glcm_Contrast	0.903544	0.887446	0.85	0.998472	0.924675	0.9	0.96689	0.940748	0.9	0.998787	0.984148	0.95	0.805646	0.8712
glcm_DifferenceEntropy	0.929923	0.891174	0.85	0.897183	0.914232	0.85	0.975925	0.944025	0.9	0.998882	0.983046	0.95	0.912903	0.877952	0.85
glcm_InverseVariance	0.903055	0.883157	0.85	0.956152	0.927621	0.9	0.936904	0.921248	0.9	0.997838	0.981436	0.95	0.932248	0.904924	0.9
glcm_DifferenceVariance	0.910669	0.890156	0.85	0.960045	0.891215	0.85	0.962426	0.930431	0.9	0.996599	0.97715	0.95	0.76967	0.852736
glcm_Idn	0.982984	0.95218	0.95	0.968644	0.864296	0.85	0.852939	0.863798	0.85	0.970345	0.954117	0.95	0.972306	0.924508	0.9
glcm_Idm	0.937493	0.893335	0.85	0.923061	0.925461	0.9	0.976522	0.945212	0.9	0.997278	0.981556	0.95	0.926404	0.885156	0.85
glcm_Correlation	0.983581	0.959058	0.95	0.931535	0.794997		0.972526	0.906848	0.9	0.930008	0.919425	0.9	0.948589	0.935617	0.9
glcm_Autocorrelation	0.861329	0.875629	0.85	0.723561	0.824037		0.918092	0.917519	0.9	0.998829	0.990712	0.95	0.773023	0.868999
glcm_SumEntropy	0.826284	0.830111		0.693112	0.832558		0.962019	0.933018	0.9	0.994155	0.966101	0.95	0.935189	0.761766
glcm_MCC	0.98394	0.942316	0.9	0.942436	0.847422		0.958815	0.922136	0.9	0.933029	0.915618	0.9	0.941738	0.932602	0.9
glcm_SumSquares	0.830739	0.854389		0.642554	0.822401		0.886328	0.926582	0.85	0.997169	0.97214	0.95	0.886756	0.787481
glcm_ClusterProminence	0.803784	0.887589		0.782307	0.859089		0.798222	0.90043		0.989319	0.964918	0.95	0.626886	0.817111
glcm_Imc2	0.979258	0.9486	0.9	0.928606	0.895591	0.85	0.995562	0.935312	0.9	0.978157	0.922122	0.9	0.94596	0.942162	0.9
glcm_Imc1	0.992138	0.968465	0.95	0.932614	0.912366	0.9	0.968441	0.935763	0.9	0.997771	0.970861	0.95	0.984445	0.961535	0.95
glcm_DifferenceAverage	0.919151	0.888082	0.85	0.919046	0.929114	0.9	0.975675	0.949002	0.9	0.998488	0.982962	0.95	0.900015	0.884143	0.85
glcm_Id	0.936029	0.892572	0.85	0.924525	0.926351	0.9	0.976749	0.946238	0.9	0.997267	0.981398	0.95	0.925326	0.883932	0.85
glcm_ClusterTendency	0.817626	0.850564		0.603079	0.809453		0.878476	0.924135	0.85	0.996423	0.969907	0.95	0.919657	0.779818
firstorder_InterquartileRange	0.822533	0.833229		0.268348	0.784091		0.885409	0.921875	0.85	0.99522	0.974861	0.95	0.810052	0.835685
firstorder_Skewness	0.948692	0.929364	0.9	0.788257	0.809467		0.884514	0.863508	0.85	0.894427	0.903927	0.85	0.954888	0.933558	0.9
firstorder_Uniformity	0.841154	0.84437		0.785361	0.858314		0.965774	0.92905	0.9	0.993363	0.964269	0.95	0.947351	0.782
firstorder_Median	0.910406	0.886416	0.85	0.828804	0.854804		0.970398	0.942867	0.9	0.998249	0.9849	0.95	0.616425	0.762689
firstorder_Energy	0.753729	0.843536		0.709204	0.809266		0.990577	0.874853	0.85	0.992855	0.959325	0.95	0.935829	0.635455
firstorder_RobustMeanAbsoluteDeviation	0.821608	0.835162		0.483622	0.81694		0.893038	0.9196	0.85	0.997793	0.976495	0.95	0.755092	0.803646
firstorder_MeanAbsoluteDeviation	0.838047	0.842036		0.66999	0.837648		0.923829	0.928493	0.9	0.998443	0.976946	0.95	0.905515	0.776284
firstorder_TotalEnergy	0.753729	0.843536		0.709204	0.809266		0.990577	0.874853	0.85	0.992855	0.959325	0.95	0.935829	0.635455
firstorder_Maximum	0.795675	0.831013		0.641431	0.743134		0.888694	0.902444	0.85	0.713081	0.87799		0.599993	0.743305
firstorder_RootMeanSquared	0.908866	0.883246	0.85	0.78941	0.838464		0.97218	0.943331	0.9	0.998841	0.986513	0.95	0.626433	0.764821
firstorder_90Percentile	0.902729	0.873416	0.85	0.844232	0.851798		0.969818	0.945572	0.9	0.999358	0.990139	0.95	0.675531	0.767989
firstorder_Minimum	0.488185	0.75		0.97273	0.922997	0.9	0.981159	0.933673	0.9	0.969835	0.921855	0.9	0.864619	0.848556
firstorder_Entropy	0.839286	0.838532		0.755425	0.8526		0.96339	0.934262	0.9	0.994248	0.966417	0.95	0.877347	0.757835
firstorder_Range	0.792294	0.832003		0.803134	0.82659		0.781509	0.872353		0.702002	0.880881		0.732224	0.814088
firstorder_Variance	0.83297	0.85556		0.729954	0.839041		0.891297	0.926211	0.85	0.996064	0.970997	0.95	0.833719	0.782877
firstorder_10Percentile	0.926177	0.902949	0.9	0.756615	0.768058		0.959132	0.915711	0.9	0.997789	0.978655	0.95	0.624679	0.789645
firstorder_Kurtosis	0.97405	0.942945	0.9	0.966319	0.862364	0.85	0.957164	0.88621	0.85	0.938475	0.909843	0.9	0.867059	0.87736	0.85
firstorder_Mean	0.910815	0.885489	0.85	0.780549	0.834833		0.971963	0.941944	0.9	0.998806	0.986227	0.95	0.623472	0.766323
glrlm_ShortRunLowGrayLevelEmphasis	0.927487	0.894861	0.85	0.887661	0.84521		0.943523	0.895791	0.85	0.750285	0.855117		0.957792	0.907861	0.9
glrlm_GrayLevelVariance	0.828346	0.851739		0.828687	0.86746		0.889681	0.92332	0.85	0.99588	0.970434	0.95	0.810761	0.76905
glrlm_LowGrayLevelRunEmphasis	0.956751	0.912836	0.9	0.915717	0.841453		0.98614	0.932926	0.9	0.998794	0.872468	0.85	0.946068	0.903624	0.9
glrlm_GrayLevelNonUniformityNormalized	0.82307	0.835865		0.791111	0.872436		0.982013	0.936944	0.9	0.99543	0.966479	0.95	0.918844	0.746232
glrlm_RunVariance	0.905848	0.886763	0.85	0.949705	0.922828	0.9	0.962708	0.946488	0.9	0.994732	0.973402	0.95	0.852933	0.877304	0.85
glrlm_GrayLevelNonUniformity	0.931542	0.908783	0.9	0.94134	0.919706	0.9	0.903715	0.834168		0.999498	0.967493	0.95	0.934961	0.878159	0.85
glrlm_LongRunEmphasis	0.910546	0.89008	0.85	0.933093	0.917708	0.9	0.967773	0.94589	0.9	0.997145	0.977283	0.95	0.858622	0.874622	0.85
glrlm_ShortRunHighGrayLevelEmphasis	0.857018	0.873286	0.85	0.68384	0.82249		0.909652	0.923958	0.9	0.998878	0.989617	0.95	0.770156	0.872262
glrlm_RunLengthNonUniformity	0.895275	0.88951	0.85	0.971699	0.919796	0.9	0.982861	0.70645		0.809632	0.827746		0.855077	0.872707	0.85
glrlm_ShortRunEmphasis	0.937978	0.895872	0.85	0.894167	0.904949	0.85	0.980378	0.944518	0.9	0.998505	0.982218	0.95	0.890522	0.872115	0.85
glrlm_LongRunHighGrayLevelEmphasis	0.874031	0.893681	0.85	0.943807	0.847568		0.91672	0.905816	0.9	0.992487	0.978473	0.95	0.786318	0.851625
glrlm_RunPercentage	0.941001	0.895966	0.85	0.928731	0.927522	0.9	0.976929	0.949292	0.9	0.996636	0.97947	0.95	0.911654	0.879749	0.85
glrlm_LongRunLowGrayLevelEmphasis	0.920272	0.932784	0.9	0.858757	0.922373	0.85	0.986066	0.968733	0.95	0.218145	0.908495		0.820109	0.881861
glrlm_RunEntropy	0.797643	0.826424		0.962429	0.890564	0.85	0.964679	0.930946	0.9	0.991441	0.954503	0.95	0.379283	0.66525
glrlm_HighGrayLevelRunEmphasis	0.860544	0.874446	0.85	0.652743	0.809916		0.913756	0.915084	0.9	0.998756	0.989674	0.95	0.769264	0.868682
glrlm_RunLengthNonUniformityNormalized	0.939639	0.894821	0.85	0.904762	0.90961	0.9	0.978906	0.946321	0.9	0.997659	0.981306	0.95	0.904934	0.876355	0.85
glszm_GrayLevelVariance	0.82147	0.834623		0.688878	0.855325		0.86426	0.889171	0.85	0.966412	0.934875	0.9	0.663067	0.761017
glszm_ZoneVariance	0.798672	0.898713		0.63988	0.913056		0.898738	0.86703	0.85	0.993768	0.978894	0.95	0.71315	0.847417
glszm_GrayLevelNonUniformityNormalized	0.786017	0.844851		0.786965	0.8865		0.946221	0.930466	0.9	0.974875	0.939982	0.9	0.70269	0.791639
glszm_SizeZoneNonUniformityNormalized	0.90084	0.892761	0.85	0.909502	0.894275	0.85	0.927765	0.893346	0.85	0.966001	0.934462	0.9	0.777658	0.866966
glszm_SizeZoneNonUniformity	0.750587	0.813183		0.442082	0.754639		0.947256	0.842702		0.979208	0.923532	0.9	0.749754	0.830491
glszm_GrayLevelNonUniformity	0.880339	0.90396	0.85	0.882328	0.784673		0.37822	0.655285		0.930398	0.908868	0.9	0.903953	0.900463	0.9
glszm_LargeAreaEmphasis	0.798559	0.898668		0.638354	0.913079		0.898888	0.867185	0.85	0.99376	0.978902	0.95	0.712718	0.847363
glszm_SmallAreaHighGrayLevelEmphasis	0.852385	0.864915	0.85	0.761763	0.84913		0.872493	0.892538	0.85	0.998506	0.986192	0.95	0.746528	0.875384
glszm_ZonePercentage	0.905766	0.880288	0.85	0.721321	0.8333		0.950738	0.923615	0.9	0.996015	0.976232	0.95	0.920387	0.885429	0.85
glszm_LargeAreaLowGrayLevelEmphasis	0.759192	0.905137		0.408841	0.908546		0.944558	0.87426	0.85	0.95717	0.969661	0.95	0.535682	0.877277
glszm_LargeAreaHighGrayLevelEmphasis	0.919354	0.912175	0.9	0.908315	0.913611	0.9	0.868374	0.835142		0.975299	0.952422	0.95	0.958594	0.926342	0.9
glszm_HighGrayLevelZoneEmphasis	0.846521	0.863344		0.768917	0.850739		0.890073	0.901176	0.85	0.99827	0.984918	0.95	0.766322	0.876799
glszm_SmallAreaEmphasis	0.892164	0.887213	0.85	0.890875	0.891669	0.85	0.936999	0.902228	0.9	0.961652	0.931477	0.9	0.766496	0.873471
glszm_LowGrayLevelZoneEmphasis	0.90782	0.88679	0.85	0.973959	0.914038	0.9	0.869177	0.866242	0.85	0.883255	0.889146	0.85	0.931206	0.932685	0.9
glszm_ZoneEntropy	0.603739	0.800166		0.885761	0.914344	0.85	0.923011	0.873712	0.85	0.955035	0.927762	0.9	0.680163	0.721997
glszm_SmallAreaLowGrayLevelEmphasis	0.916079	0.888097	0.85	0.9214	0.928355	0.9	0.832941	0.897222		0.864511	0.88093	0.85	0.980526	0.934987	0.9
ngtdm_Coarseness	0.91719	0.924162	0.9	0.996375	0.8954	0.85	0.916915	0.782406		0.985714	0.913819	0.9	0.741518	0.8703
ngtdm_Complexity	0.814395	0.871713		0.659042	0.831		0.717972	0.890828		0.975121	0.956079	0.95	0.637308	0.859861
ngtdm_Strength	0.843381	0.870284		0.913927	0.891072	0.85	0.621423	0.793342		0.749647	0.872688		0.848411	0.864497
ngtdm_Contrast	0.962043	0.919548	0.9	0.646124	0.82944		0.956527	0.923833	0.9	0.993324	0.97255	0.95	0.98903	0.878396	0.85
ngtdm_Busyness	0.735397	0.804627		0.914596	0.823822		0.915326	0.881982	0.85	0.995824	0.937028	0.9	0.626038	0.7876

## Sheet: ICC_intra
Features	T2w_TSE	T1w_TSE	FLAIR	T2_map	HASTE
shape_VoxelVolume	0.983884	0.994876	0.976781	0.992627	0.976461
shape_Maximum3DDiameter	0.997493	0.998532	0.996926	0.997167	0.996133
shape_MeshVolume	0.983883	0.994877	0.976835	0.992658	0.976455
shape_MajorAxisLength	0.993273	0.997712	0.990821	0.996171	0.990365
shape_Sphericity	0.967012	0.999031	0.964749	0.915555	0.975928
shape_Elongation	0.998141	0.998935	0.993884	0.994149	0.985227
shape_SurfaceVolumeRatio	0.970983	0.998553	0.96572	0.934854	0.958785
shape_Maximum2DDiameterSlice	0.999787	0.999851	0.997697	0.997617	0.999936
shape_Flatness	0.998711	0.999583	0.998191	0.998792	0.997344
shape_SurfaceArea	0.992182	0.99555	0.988573	0.99186	0.988665
shape_MinorAxisLength	0.993329	0.997989	0.991032	0.996168	0.988805
shape_Maximum2DDiameterColumn	0.998176	0.998632	0.996354	0.991945	0.994568
shape_Maximum2DDiameterRow	0.996484	0.996947	0.994904	0.99387	0.993967
gldm_GrayLevelVariance	0.986683	0.992421	0.96116	0.995805	0.970369
gldm_HighGrayLevelEmphasis	0.99786	0.995365	0.979753	0.99868	0.994669
gldm_DependenceEntropy	0.906253	0.969365	0.97763	0.979189	0.859653
gldm_DependenceNonUniformity	0.898895	0.996304	0.963312	0.992178	0.786923
gldm_GrayLevelNonUniformity	0.997317	0.997064	0.993	0.994041	0.966331
gldm_SmallDependenceEmphasis	0.997265	0.996839	0.993194	0.99942	0.982238
gldm_SmallDependenceHighGrayLevelEmphasis	0.996224	0.996742	0.985393	0.9985	0.98308
gldm_DependenceNonUniformityNormalized	0.997053	0.999492	0.988569	0.999332	0.962148
gldm_LargeDependenceEmphasis	0.997102	0.999153	0.995299	0.996633	0.984992
gldm_LargeDependenceLowGrayLevelEmphasis	0.961457	0.966748	0.909889	0.766127	0.912262
gldm_DependenceVariance	0.993464	0.998424	0.991488	0.994685	0.973256
gldm_LargeDependenceHighGrayLevelEmphasis	0.989378	0.997324	0.98332	0.997217	0.989692
gldm_SmallDependenceLowGrayLevelEmphasis	0.955813	0.7886	0.686214	0.66037	0.660111
gldm_LowGrayLevelEmphasis	0.975259	0.902877	0.923291	0.811241	0.786773
glcm_JointAverage	0.997249	0.992357	0.983093	0.998011	0.991634
glcm_SumAverage	0.997249	0.992357	0.983093	0.998011	0.991634
glcm_JointEntropy	0.993729	0.9957	0.988677	0.998659	0.975258
glcm_ClusterShade	0.995195	0.992696	0.90862	0.995108	0.821221
glcm_MaximumProbability	0.982743	0.992164	0.985505	0.983187	0.928244
glcm_Idmn	0.985643	0.987105	0.989505	0.99844	0.907499
glcm_JointEnergy	0.987631	0.992618	0.986617	0.989919	0.943913
glcm_Contrast	0.993031	0.998819	0.981143	0.998992	0.977859
glcm_DifferenceEntropy	0.997745	0.999218	0.99199	0.999462	0.982367
glcm_InverseVariance	0.991435	0.998026	0.977802	0.99945	0.959249
glcm_DifferenceVariance	0.993477	0.997957	0.979581	0.998462	0.986892
glcm_Idn	0.992656	0.992847	0.991939	0.998156	0.931914
glcm_Idm	0.998203	0.999406	0.99288	0.999274	0.981872
glcm_Correlation	0.991977	0.997597	0.984448	0.98139	0.981544
glcm_Autocorrelation	0.997731	0.995503	0.979849	0.998696	0.993958
glcm_SumEntropy	0.984641	0.98659	0.986686	0.996713	0.956547
glcm_MCC	0.990626	0.995761	0.97958	0.929708	0.965386
glcm_SumSquares	0.984288	0.990087	0.955222	0.997249	0.961284
glcm_ClusterProminence	0.987085	0.990515	0.88695	0.990778	0.956113
glcm_Imc2	0.98321	0.998475	0.986327	0.97592	0.986014
glcm_Imc1	0.995656	0.998725	0.990658	0.994266	0.98542
glcm_DifferenceAverage	0.995859	0.99927	0.989697	0.999371	0.977629
glcm_Id	0.998124	0.999374	0.99316	0.999302	0.981958
glcm_ClusterTendency	0.981746	0.988576	0.953537	0.996713	0.95862
firstorder_InterquartileRange	0.97903	0.987863	0.972021	0.998416	0.809827
firstorder_Skewness	0.990504	0.987501	0.975951	0.932617	0.948203
firstorder_Uniformity	0.984945	0.991107	0.989089	0.992804	0.924724
firstorder_Median	0.999204	0.998576	0.996888	0.999912	0.988719
firstorder_Energy	0.992315	0.987264	0.974034	0.999011	0.866313
firstorder_RobustMeanAbsoluteDeviation	0.981541	0.993217	0.975321	0.998444	0.875734
firstorder_MeanAbsoluteDeviation	0.987441	0.9943	0.976833	0.998217	0.952013
firstorder_TotalEnergy	0.992315	0.987264	0.974034	0.999011	0.866313
firstorder_Maximum	0.998917	0.959574	0.984406	0.948973	1
firstorder_RootMeanSquared	0.998875	0.998	0.995663	0.999895	0.98966
firstorder_90Percentile	0.997821	0.996658	0.993002	0.999956	0.990786
firstorder_Minimum	0.63148	0.998	0.942231	0.926781	0.953564
firstorder_Entropy	0.98872	0.989109	0.987361	0.997003	0.967562
firstorder_Range	0.999291	0.983733	0.981416	0.938059	0.99508
firstorder_Variance	0.986655	0.992326	0.961044	0.9958	0.970407
firstorder_10Percentile	0.998883	0.99506	0.989887	0.998999	0.960138
firstorder_Kurtosis	0.982878	0.999065	0.994913	0.954089	0.874962
firstorder_Mean	0.998956	0.998028	0.995891	0.999897	0.989156
glrlm_ShortRunLowGrayLevelEmphasis	0.985295	0.784162	0.915411	0.776307	0.7655
glrlm_GrayLevelVariance	0.988069	0.995141	0.965875	0.99549	0.975415
glrlm_LowGrayLevelRunEmphasis	0.984138	0.84273	0.941871	0.813692	0.774279
glrlm_GrayLevelNonUniformityNormalized	0.987277	0.994238	0.991129	0.994135	0.924041
glrlm_RunVariance	0.99692	0.998748	0.995556	0.993806	0.985483
glrlm_GrayLevelNonUniformity	0.992393	0.99447	0.986866	0.996147	0.940739
glrlm_LongRunEmphasis	0.998217	0.998816	0.994916	0.9949	0.985209
glrlm_ShortRunHighGrayLevelEmphasis	0.997861	0.99561	0.980496	0.99863	0.993918
glrlm_RunLengthNonUniformity	0.936921	0.997551	0.967442	0.975301	0.910685
glrlm_ShortRunEmphasis	0.999224	0.999084	0.990967	0.998461	0.976304
glrlm_LongRunHighGrayLevelEmphasis	0.996521	0.995502	0.976822	0.9983	0.994936
glrlm_RunPercentage	0.998418	0.999349	0.994387	0.998539	0.984866
glrlm_LongRunLowGrayLevelEmphasis	0.965769	0.96228	0.921618	0.759757	0.854351
glrlm_RunEntropy	0.969787	0.995732	0.985456	0.995137	0.915793
glrlm_HighGrayLevelRunEmphasis	0.997805	0.994714	0.979689	0.99863	0.994637
glrlm_RunLengthNonUniformityNormalized	0.998871	0.999269	0.991355	0.998938	0.97676
glszm_GrayLevelVariance	0.994132	0.995518	0.958988	0.974265	0.986218
glszm_ZoneVariance	0.99689	0.996013	0.996993	0.985678	0.952008
glszm_GrayLevelNonUniformityNormalized	0.997396	0.976213	0.986571	0.993212	0.988448
glszm_SizeZoneNonUniformityNormalized	0.994909	0.969485	0.960241	0.994531	0.918846
glszm_SizeZoneNonUniformity	0.99176	0.919781	0.94119	0.997471	0.959336
glszm_GrayLevelNonUniformity	0.944473	0.973115	0.882963	0.983274	0.838264
glszm_LargeAreaEmphasis	0.996901	0.996014	0.996998	0.985693	0.95203
glszm_SmallAreaHighGrayLevelEmphasis	0.99749	0.995279	0.9713	0.998132	0.996106
glszm_ZonePercentage	0.996826	0.996546	0.995628	0.99939	0.97837
glszm_LargeAreaLowGrayLevelEmphasis	0.992815	0.986104	0.995253	0.943449	0.908593
glszm_LargeAreaHighGrayLevelEmphasis	0.992683	0.996513	0.989383	0.915494	0.9802
glszm_HighGrayLevelZoneEmphasis	0.997796	0.997255	0.978057	0.998156	0.99498
glszm_SmallAreaEmphasis	0.994692	0.973033	0.969954	0.994013	0.922864
glszm_LowGrayLevelZoneEmphasis	0.993687	0.735923	0.852885	0.703707	0.652224
glszm_ZoneEntropy	0.970343	0.994689	0.932208	0.961649	0.88146
glszm_SmallAreaLowGrayLevelEmphasis	0.993865	0.762781	0.812443	0.695329	0.641835
ngtdm_Coarseness	0.974317	0.997038	0.98128	0.987076	0.858335
ngtdm_Complexity	0.995243	0.949165	0.966039	0.978768	0.991202
ngtdm_Strength	0.990005	0.975781	0.969807	0.790704	0.975834
ngtdm_Contrast	0.970564	0.977544	0.976256	0.998536	0.937691
ngtdm_Busyness	0.990484	0.971722	0.994536	0.965716	0.930729

## Sheet: ICC_Inter
Features	T2w_TSE	T1w_TSE	FLAIR	T2_map	HASTE
shape_VoxelVolume	0.638471	0.599952	0.575886	0.647876	0.62385
shape_Maximum3DDiameter	0.994344	0.991914	0.984375	0.986716	0.99236
shape_MeshVolume	0.638378	0.600636	0.575882	0.647814	0.623742
shape_MajorAxisLength	0.995035	0.992542	0.982679	0.997494	0.990481
shape_Sphericity	0.103184	0.809815	0.195212	0.563642	0.0676826
shape_Elongation	0.99592	0.990266	0.992565	0.992822	0.989991
shape_SurfaceVolumeRatio	-0.0113219	0.737947	-0.0704192	-0.0905665	-0.060363
shape_Maximum2DDiameterSlice	0.999504	0.995665	0.998554	0.993639	0.999763
shape_Flatness	0.130475	0.0107585	0.210307	0.125785	0.145861
shape_SurfaceArea	0.887003	0.803285	0.84746	0.875039	0.886025
shape_MinorAxisLength	0.995853	0.992122	0.982624	0.998258	0.990027
shape_Maximum2DDiameterColumn	0.991556	0.984097	0.981518	0.987363	0.988112
shape_Maximum2DDiameterRow	0.989942	0.982367	0.971553	0.9768	0.986232
gldm_GrayLevelVariance	0.973573	0.755837	0.872156	0.989953	0.821048
gldm_HighGrayLevelEmphasis	0.996231	0.987711	0.976437	0.998952	0.980492
gldm_DependenceEntropy	0.867351	0.746058	0.885567	0.952874	0.0644744
gldm_DependenceNonUniformity	-0.0809289	0.706314	0.435599	0.479104	-0.204974
gldm_GrayLevelNonUniformity	0.87424	0.823598	0.871851	0.905885	0.899796
gldm_SmallDependenceEmphasis	0.989276	0.977803	0.98452	0.997147	0.971309
gldm_SmallDependenceHighGrayLevelEmphasis	0.993466	0.99424	0.970804	0.998489	0.96494
gldm_DependenceNonUniformityNormalized	0.992511	0.991035	0.983638	0.993726	0.945437
gldm_LargeDependenceEmphasis	0.998296	0.989188	0.981986	0.995614	0.985387
gldm_LargeDependenceLowGrayLevelEmphasis	0.995765	0.985579	0.954037	0.714051	0.925189
gldm_DependenceVariance	0.997924	0.993141	0.984002	0.991315	0.975784
gldm_LargeDependenceHighGrayLevelEmphasis	0.981363	0.988953	0.988687	0.974625	0.985877
gldm_SmallDependenceLowGrayLevelEmphasis	0.676047	0.819566	0.625031	0.224725	0.826418
gldm_LowGrayLevelEmphasis	0.964105	0.899292	0.96593	0.663455	0.881505
glcm_JointAverage	0.993833	0.984991	0.981929	0.997167	0.984157
glcm_SumAverage	0.993833	0.984991	0.981929	0.997167	0.984157
glcm_JointEntropy	0.985598	0.94941	0.949819	0.994779	0.914558
glcm_ClusterShade	0.998323	0.714801	0.752134	0.992057	0.896885
glcm_MaximumProbability	0.985302	0.940827	0.929529	0.977657	0.861584
glcm_Idmn	0.950541	0.896551	0.915393	0.98992	0.935098
glcm_JointEnergy	0.986881	0.925379	0.925163	0.992442	0.832396
glcm_Contrast	0.987241	0.964907	0.967737	0.997478	0.969354
glcm_DifferenceEntropy	0.99402	0.985588	0.974836	0.997951	0.971641
glcm_InverseVariance	0.986976	0.975487	0.936911	0.997546	0.940863
glcm_DifferenceVariance	0.990012	0.945394	0.964722	0.998133	0.984435
glcm_Idn	0.975767	0.949784	0.940061	0.989417	0.929635
glcm_Idm	0.996063	0.987689	0.976028	0.997502	0.973782
glcm_Correlation	0.970666	0.904986	0.930041	0.988613	0.865367
glcm_Autocorrelation	0.996184	0.988023	0.976844	0.999001	0.977813
glcm_SumEntropy	0.968611	0.838233	0.936337	0.993742	0.773647
glcm_MCC	0.986261	0.902802	0.914192	0.942613	0.93426
glcm_SumSquares	0.975237	0.710625	0.862845	0.992491	0.773248
glcm_ClusterProminence	0.991581	0.737259	0.706512	0.989647	0.836417
glcm_Imc2	0.961016	0.926643	0.921632	0.939698	0.921724
glcm_Imc1	0.993895	0.97367	0.959924	0.990354	0.988951
glcm_DifferenceAverage	0.990715	0.984711	0.976848	0.997025	0.965227
glcm_Id	0.995868	0.987472	0.976587	0.997486	0.973654
glcm_ClusterTendency	0.972053	0.682718	0.855168	0.99143	0.738362
firstorder_InterquartileRange	0.967635	0.91154	0.916948	0.996696	0.579156
firstorder_Skewness	0.956971	0.889075	0.908811	0.982925	0.949008
firstorder_Uniformity	0.975009	0.88494	0.937011	0.991131	0.717742
firstorder_Median	0.999817	0.998447	0.995763	0.999783	0.988405
firstorder_Energy	0.791932	0.34536	0.686257	0.928171	0.1104
firstorder_RobustMeanAbsoluteDeviation	0.969521	0.805228	0.916777	0.99691	0.602868
firstorder_MeanAbsoluteDeviation	0.976838	0.794548	0.917962	0.996043	0.771262
firstorder_TotalEnergy	0.791932	0.34536	0.686257	0.928171	0.1104
firstorder_Maximum	0.994905	0.90965	0.915457	0.909685	0.99807
firstorder_RootMeanSquared	0.999602	0.992537	0.992564	0.999798	0.984594
firstorder_90Percentile	0.998202	0.987393	0.982955	0.99995	0.960908
firstorder_Minimum	0.249676	0.999235	0.9962	0.85632	0.991006
firstorder_Entropy	0.97552	0.874036	0.939807	0.994127	0.838877
firstorder_Range	0.987377	0.964322	0.838243	0.903692	0.993307
firstorder_Variance	0.973689	0.755159	0.872116	0.989953	0.821191
firstorder_10Percentile	0.999048	0.796149	0.987118	0.996274	0.932456
firstorder_Kurtosis	0.909803	0.945066	0.923173	0.974367	0.672637
firstorder_Mean	0.999706	0.989753	0.993607	0.99974	0.985899
glrlm_ShortRunLowGrayLevelEmphasis	0.902587	0.783697	0.898238	0.515283	0.860286
glrlm_GrayLevelVariance	0.972578	0.809696	0.873196	0.98993	0.841444
glrlm_LowGrayLevelRunEmphasis	0.952993	0.841645	0.96509	0.590453	0.871601
glrlm_GrayLevelNonUniformityNormalized	0.972759	0.883187	0.94766	0.991124	0.731269
glrlm_RunVariance	0.99914	0.989615	0.981461	0.995486	0.977935
glrlm_GrayLevelNonUniformity	0.821456	0.767154	0.814716	0.900094	0.778292
glrlm_LongRunEmphasis	0.999248	0.989694	0.982415	0.997587	0.978904
glrlm_ShortRunHighGrayLevelEmphasis	0.996091	0.98472	0.969043	0.9991	0.981069
glrlm_RunLengthNonUniformity	0.12154	0.734331	0.373547	0.0450532	0.0108928
glrlm_ShortRunEmphasis	0.99765	0.987454	0.977914	0.997903	0.973428
glrlm_LongRunHighGrayLevelEmphasis	0.990963	0.983003	0.974454	0.99623	0.983118
glrlm_RunPercentage	0.997903	0.989596	0.982148	0.997341	0.983558
glrlm_LongRunLowGrayLevelEmphasis	0.992016	0.971625	0.935455	0.702206	0.933748
glrlm_RunEntropy	0.936232	0.930466	0.924	0.987271	0.622319
glrlm_HighGrayLevelRunEmphasis	0.996017	0.982667	0.973202	0.998949	0.9814
glrlm_RunLengthNonUniformityNormalized	0.99723	0.98776	0.978549	0.997783	0.973577
glszm_GrayLevelVariance	0.985226	0.949048	0.818904	0.979489	0.993664
glszm_ZoneVariance	0.874342	0.845753	0.859743	0.912469	0.95806
glszm_GrayLevelNonUniformityNormalized	0.993825	0.921082	0.967198	0.986609	0.990384
glszm_SizeZoneNonUniformityNormalized	0.9618	0.875892	0.93041	0.977418	0.889289
glszm_SizeZoneNonUniformity	0.707736	0.316626	0.66589	0.773916	0.701227
glszm_GrayLevelNonUniformity	0.42762	0.229289	0.130555	0.591849	0.209366
glszm_LargeAreaEmphasis	0.874671	0.846113	0.860026	0.912868	0.958206
glszm_SmallAreaHighGrayLevelEmphasis	0.995291	0.982609	0.937031	0.998893	0.987365
glszm_ZonePercentage	0.986843	0.966629	0.980834	0.997401	0.958995
glszm_LargeAreaLowGrayLevelEmphasis	0.892916	0.870208	0.86183	0.946152	0.988655
glszm_LargeAreaHighGrayLevelEmphasis	0.841832	0.8046	0.824853	0.708658	0.910141
glszm_HighGrayLevelZoneEmphasis	0.994535	0.98672	0.948746	0.998766	0.986153
glszm_SmallAreaEmphasis	0.957272	0.885362	0.946039	0.974997	0.889388
glszm_LowGrayLevelZoneEmphasis	0.97008	0.740096	0.658694	0.272639	0.823654
glszm_ZoneEntropy	0.936561	0.966501	0.811412	0.962987	0.846901
glszm_SmallAreaLowGrayLevelEmphasis	0.971334	0.801361	0.620761	0.262135	0.825802
ngtdm_Coarseness	0.598662	0.787574	0.728561	0.517264	0.599067
ngtdm_Complexity	0.991544	0.939737	0.725518	0.988628	0.986772
ngtdm_Strength	0.927726	0.849893	0.765279	0.837895	0.953179
ngtdm_Contrast	0.964913	0.808863	0.989248	0.993067	0.806216
ngtdm_Busyness	0.864352	0.874203	0.902347	0.962321	0.90404

## Sheet: T2w TSE
Features	CCC	DR	CCC&DR cutoff	intra_ICC	inter_ICC
shape_Maximum3DDiameter	0.997682	0.983334	0.95	0.997493	0.994344
shape_MajorAxisLength	0.992377	0.97755	0.95	0.993273	0.995035
shape_Elongation	0.963817	0.945853	0.9	0.998141	0.99592
shape_Maximum2DDiameterSlice	0.99786	0.985103	0.95	0.999787	0.999504
shape_SurfaceArea	0.990083	0.971895	0.95	0.992182	0.887003
shape_MinorAxisLength	0.987491	0.961795	0.95	0.993329	0.995853
shape_Maximum2DDiameterColumn	0.995313	0.978511	0.95	0.998176	0.991556
shape_Maximum2DDiameterRow	0.995261	0.975185	0.95	0.996484	0.989942
gldm_LargeDependenceEmphasis	0.942056	0.900849	0.9	0.997102	0.998296
gldm_LargeDependenceLowGrayLevelEmphasis	0.917074	0.941831	0.9	0.961457	0.995765
gldm_LargeDependenceHighGrayLevelEmphasis	0.937104	0.925157	0.9	0.989378	0.981363
gldm_LowGrayLevelEmphasis	0.9505	0.927894	0.9	0.975259	0.964105
glcm_Idmn	0.971396	0.942623	0.9	0.985643	0.950541
glcm_Idn	0.982984	0.95218	0.95	0.992656	0.975767
glcm_Correlation	0.983581	0.959058	0.95	0.991977	0.970666
glcm_MCC	0.98394	0.942316	0.9	0.990626	0.986261
glcm_Imc2	0.979258	0.9486	0.9	0.98321	0.961016
glcm_Imc1	0.992138	0.968465	0.95	0.995656	0.993895
firstorder_Skewness	0.948692	0.929364	0.9	0.990504	0.956971
firstorder_10Percentile	0.926177	0.902949	0.9	0.998883	0.999048
firstorder_Kurtosis	0.97405	0.942945	0.9	0.982878	0.909803
glrlm_LowGrayLevelRunEmphasis	0.956751	0.912836	0.9	0.984138	0.952993
glrlm_GrayLevelNonUniformity	0.931542	0.908783	0.9	0.992393	0.821456
glrlm_LongRunLowGrayLevelEmphasis	0.920272	0.932784	0.9	0.965769	0.992016
glszm_LargeAreaHighGrayLevelEmphasis	0.919354	0.912175	0.9	0.992683	0.841832
ngtdm_Contrast	0.962043	0.919548	0.9	0.970564	0.964913

## Sheet: T1w TSE
Features	CCC	DR	CCC&DR cutoff	intra_ICC	inter_ICC
shape_Maximum3DDiameter	0.996717	0.96596	0.95	0.998532	0.991914
shape_MajorAxisLength	0.982639	0.952546	0.95	0.997712	0.992542
shape_Sphericity	0.931618	0.923198	0.9	0.999031	0.809815
shape_Elongation	0.992712	0.948719	0.9	0.998935	0.990266
shape_Maximum2DDiameterSlice	0.999564	0.975163	0.95	0.999851	0.995665
shape_SurfaceArea	0.946941	0.926071	0.9	0.99555	0.803285
shape_MinorAxisLength	0.983251	0.955133	0.95	0.997989	0.992122
shape_Maximum2DDiameterColumn	0.997219	0.971403	0.95	0.998632	0.984097
shape_Maximum2DDiameterRow	0.988261	0.966395	0.95	0.996947	0.982367
gldm_GrayLevelNonUniformity	0.993283	0.919131	0.9	0.997064	0.823598
gldm_DependenceNonUniformityNormalized	0.931582	0.935374	0.9	0.999492	0.991035
gldm_LargeDependenceEmphasis	0.933281	0.929986	0.9	0.999153	0.989188
gldm_LargeDependenceLowGrayLevelEmphasis	0.993127	0.929859	0.9	0.966748	0.985579
gldm_DependenceVariance	0.976812	0.955663	0.95	0.998424	0.993141
gldm_SmallDependenceLowGrayLevelEmphasis	0.909127	0.913824	0.9	0.7886	0.819566
glcm_Contrast	0.998472	0.924675	0.9	0.998819	0.964907
glcm_InverseVariance	0.956152	0.927621	0.9	0.998026	0.975487
glcm_Idm	0.923061	0.925461	0.9	0.999406	0.987689
glcm_Imc1	0.932614	0.912366	0.9	0.998725	0.97367
glcm_DifferenceAverage	0.919046	0.929114	0.9	0.99927	0.984711
glcm_Id	0.924525	0.926351	0.9	0.999374	0.987472
firstorder_Minimum	0.97273	0.922997	0.9	0.998	0.999235
glrlm_RunVariance	0.949705	0.922828	0.9	0.998748	0.989615
glrlm_GrayLevelNonUniformity	0.94134	0.919706	0.9	0.99447	0.767154
glrlm_LongRunEmphasis	0.933093	0.917708	0.9	0.998816	0.989694
glrlm_RunPercentage	0.928731	0.927522	0.9	0.999349	0.989596
glrlm_RunLengthNonUniformityNormalized	0.904762	0.90961	0.9	0.999269	0.98776
glszm_LargeAreaHighGrayLevelEmphasis	0.908315	0.913611	0.9	0.996513	0.8046
glszm_SmallAreaLowGrayLevelEmphasis	0.9214	0.928355	0.9	0.762781	0.801361

## Sheet: FLAIR
Features	CCC	DR	CCC&DR cutoff	intra_ICC	inter_ICC
shape_Maximum3DDiameter	0.998558	0.972072	0.95	0.996926	0.984375
shape_MajorAxisLength	0.995668	0.964346	0.95	0.990821	0.982679
shape_Elongation	0.97717	0.964897	0.95	0.993884	0.992565
shape_Maximum2DDiameterSlice	0.99811	0.988236	0.95	0.997697	0.998554
shape_MinorAxisLength	0.994443	0.961088	0.95	0.991032	0.982624
shape_Maximum2DDiameterColumn	0.995917	0.965169	0.95	0.996354	0.981518
shape_Maximum2DDiameterRow	0.988972	0.954015	0.95	0.994904	0.971553
gldm_HighGrayLevelEmphasis	0.917268	0.917081	0.9	0.979753	0.976437
gldm_DependenceEntropy	0.963371	0.919797	0.9	0.97763	0.885567
gldm_SmallDependenceEmphasis	0.956064	0.939769	0.9	0.993194	0.98452
gldm_DependenceNonUniformityNormalized	0.971021	0.942146	0.9	0.988569	0.983638
gldm_LargeDependenceEmphasis	0.976886	0.949799	0.9	0.995299	0.981986
gldm_LargeDependenceLowGrayLevelEmphasis	0.991827	0.97334	0.95	0.909889	0.954037
gldm_DependenceVariance	0.97733	0.946419	0.9	0.991488	0.984002
gldm_LargeDependenceHighGrayLevelEmphasis	0.94484	0.921233	0.9	0.98332	0.988687
gldm_LowGrayLevelEmphasis	0.980722	0.953571	0.95	0.923291	0.96593
glcm_JointAverage	0.942938	0.922948	0.9	0.983093	0.981929
glcm_SumAverage	0.942938	0.922948	0.9	0.983093	0.981929
glcm_JointEntropy	0.967893	0.934949	0.9	0.988677	0.949819
glcm_MaximumProbability	0.917932	0.901946	0.9	0.985505	0.929529
glcm_JointEnergy	0.94239	0.91117	0.9	0.986617	0.925163
glcm_Contrast	0.96689	0.940748	0.9	0.981143	0.967737
glcm_DifferenceEntropy	0.975925	0.944025	0.9	0.99199	0.974836
glcm_InverseVariance	0.936904	0.921248	0.9	0.977802	0.936911
glcm_DifferenceVariance	0.962426	0.930431	0.9	0.979581	0.964722
glcm_Idm	0.976522	0.945212	0.9	0.99288	0.976028
glcm_Correlation	0.972526	0.906848	0.9	0.984448	0.930041
glcm_Autocorrelation	0.918092	0.917519	0.9	0.979849	0.976844
glcm_SumEntropy	0.962019	0.933018	0.9	0.986686	0.936337
glcm_MCC	0.958815	0.922136	0.9	0.97958	0.914192
glcm_Imc2	0.995562	0.935312	0.9	0.986327	0.921632
glcm_Imc1	0.968441	0.935763	0.9	0.990658	0.959924
glcm_DifferenceAverage	0.975675	0.949002	0.9	0.989697	0.976848
glcm_Id	0.976749	0.946238	0.9	0.99316	0.976587
firstorder_Uniformity	0.965774	0.92905	0.9	0.989089	0.937011
firstorder_Median	0.970398	0.942867	0.9	0.996888	0.995763
firstorder_MeanAbsoluteDeviation	0.923829	0.928493	0.9	0.976833	0.917962
firstorder_RootMeanSquared	0.97218	0.943331	0.9	0.995663	0.992564
firstorder_90Percentile	0.969818	0.945572	0.9	0.993002	0.982955
firstorder_Minimum	0.981159	0.933673	0.9	0.942231	0.9962
firstorder_Entropy	0.96339	0.934262	0.9	0.987361	0.939807
firstorder_10Percentile	0.959132	0.915711	0.9	0.989887	0.987118
firstorder_Mean	0.971963	0.941944	0.9	0.995891	0.993607
glrlm_LowGrayLevelRunEmphasis	0.98614	0.932926	0.9	0.941871	0.96509
glrlm_GrayLevelNonUniformityNormalized	0.982013	0.936944	0.9	0.991129	0.94766
glrlm_RunVariance	0.962708	0.946488	0.9	0.995556	0.981461
glrlm_LongRunEmphasis	0.967773	0.94589	0.9	0.994916	0.982415
glrlm_ShortRunHighGrayLevelEmphasis	0.909652	0.923958	0.9	0.980496	0.969043
glrlm_ShortRunEmphasis	0.980378	0.944518	0.9	0.990967	0.977914
glrlm_LongRunHighGrayLevelEmphasis	0.91672	0.905816	0.9	0.976822	0.974454
glrlm_RunPercentage	0.976929	0.949292	0.9	0.994387	0.982148
glrlm_LongRunLowGrayLevelEmphasis	0.986066	0.968733	0.95	0.921618	0.935455
glrlm_RunEntropy	0.964679	0.930946	0.9	0.985456	0.924
glrlm_HighGrayLevelRunEmphasis	0.913756	0.915084	0.9	0.979689	0.973202
glrlm_RunLengthNonUniformityNormalized	0.978906	0.946321	0.9	0.991355	0.978549
glszm_GrayLevelNonUniformityNormalized	0.946221	0.930466	0.9	0.986571	0.967198
glszm_ZonePercentage	0.950738	0.923615	0.9	0.995628	0.980834
glszm_SmallAreaEmphasis	0.936999	0.902228	0.9	0.969954	0.946039
ngtdm_Contrast	0.956527	0.923833	0.9	0.976256	0.989248

## Sheet: T2 map
Features	CCC	DR	CCC&DR cutoff	intra_ICC	inter_ICC
shape_Maximum3DDiameter	0.992053	0.962517	0.95	0.997167	0.986716
shape_MajorAxisLength	0.997934	0.979814	0.95	0.996171	0.997494
shape_Elongation	0.916921	0.926855	0.9	0.994149	0.992822
shape_Maximum2DDiameterSlice	0.993835	0.978222	0.95	0.997617	0.993639
shape_SurfaceArea	0.997564	0.933739	0.9	0.99186	0.875039
shape_MinorAxisLength	0.992074	0.966967	0.95	0.996168	0.998258
shape_Maximum2DDiameterColumn	0.988371	0.957575	0.95	0.991945	0.987363
shape_Maximum2DDiameterRow	0.992099	0.953957	0.95	0.99387	0.9768
gldm_GrayLevelVariance	0.996049	0.970967	0.95	0.995805	0.989953
gldm_HighGrayLevelEmphasis	0.998718	0.990018	0.95	0.99868	0.998952
gldm_DependenceEntropy	0.97686	0.930693	0.9	0.979189	0.952874
gldm_GrayLevelNonUniformity	0.996722	0.96844	0.95	0.994041	0.905885
gldm_SmallDependenceEmphasis	0.996185	0.976846	0.95	0.99942	0.997147
gldm_SmallDependenceHighGrayLevelEmphasis	0.997855	0.990267	0.95	0.9985	0.998489
gldm_DependenceNonUniformityNormalized	0.989914	0.971106	0.95	0.999332	0.993726
gldm_LargeDependenceEmphasis	0.996045	0.977687	0.95	0.996633	0.995614
gldm_DependenceVariance	0.980742	0.958321	0.95	0.994685	0.991315
gldm_LargeDependenceHighGrayLevelEmphasis	0.910639	0.955692	0.9	0.997217	0.974625
glcm_JointAverage	0.998685	0.987459	0.95	0.998011	0.997167
glcm_SumAverage	0.998685	0.987459	0.95	0.998011	0.997167
glcm_JointEntropy	0.995863	0.971964	0.95	0.998659	0.994779
glcm_ClusterShade	0.983974	0.960632	0.95	0.995108	0.992057
glcm_MaximumProbability	0.973167	0.950347	0.95	0.983187	0.977657
glcm_Idmn	0.977085	0.958085	0.95	0.99844	0.98992
glcm_JointEnergy	0.994722	0.970353	0.95	0.989919	0.992442
glcm_Contrast	0.998787	0.984148	0.95	0.998992	0.997478
glcm_DifferenceEntropy	0.998882	0.983046	0.95	0.999462	0.997951
glcm_InverseVariance	0.997838	0.981436	0.95	0.99945	0.997546
glcm_DifferenceVariance	0.996599	0.97715	0.95	0.998462	0.998133
glcm_Idn	0.970345	0.954117	0.95	0.998156	0.989417
glcm_Idm	0.997278	0.981556	0.95	0.999274	0.997502
glcm_Correlation	0.930008	0.919425	0.9	0.98139	0.988613
glcm_Autocorrelation	0.998829	0.990712	0.95	0.998696	0.999001
glcm_SumEntropy	0.994155	0.966101	0.95	0.996713	0.993742
glcm_MCC	0.933029	0.915618	0.9	0.929708	0.942613
glcm_SumSquares	0.997169	0.97214	0.95	0.997249	0.992491
glcm_ClusterProminence	0.989319	0.964918	0.95	0.990778	0.989647
glcm_Imc2	0.978157	0.922122	0.9	0.97592	0.939698
glcm_Imc1	0.997771	0.970861	0.95	0.994266	0.990354
glcm_DifferenceAverage	0.998488	0.982962	0.95	0.999371	0.997025
glcm_Id	0.997267	0.981398	0.95	0.999302	0.997486
glcm_ClusterTendency	0.996423	0.969907	0.95	0.996713	0.99143
firstorder_InterquartileRange	0.99522	0.974861	0.95	0.998416	0.996696
firstorder_Uniformity	0.993363	0.964269	0.95	0.992804	0.991131
firstorder_Median	0.998249	0.9849	0.95	0.999912	0.999783
firstorder_Energy	0.992855	0.959325	0.95	0.999011	0.928171
firstorder_RobustMeanAbsoluteDeviation	0.997793	0.976495	0.95	0.998444	0.99691
firstorder_MeanAbsoluteDeviation	0.998443	0.976946	0.95	0.998217	0.996043
firstorder_TotalEnergy	0.992855	0.959325	0.95	0.999011	0.928171
firstorder_RootMeanSquared	0.998841	0.986513	0.95	0.999895	0.999798
firstorder_90Percentile	0.999358	0.990139	0.95	0.999956	0.99995
firstorder_Minimum	0.969835	0.921855	0.9	0.926781	0.85632
firstorder_Entropy	0.994248	0.966417	0.95	0.997003	0.994127
firstorder_Variance	0.996064	0.970997	0.95	0.9958	0.989953
firstorder_10Percentile	0.997789	0.978655	0.95	0.998999	0.996274
firstorder_Kurtosis	0.938475	0.909843	0.9	0.954089	0.974367
firstorder_Mean	0.998806	0.986227	0.95	0.999897	0.99974
glrlm_GrayLevelVariance	0.99588	0.970434	0.95	0.99549	0.98993
glrlm_GrayLevelNonUniformityNormalized	0.99543	0.966479	0.95	0.994135	0.991124
glrlm_RunVariance	0.994732	0.973402	0.95	0.993806	0.995486
glrlm_GrayLevelNonUniformity	0.999498	0.967493	0.95	0.996147	0.900094
glrlm_LongRunEmphasis	0.997145	0.977283	0.95	0.9949	0.997587
glrlm_ShortRunHighGrayLevelEmphasis	0.998878	0.989617	0.95	0.99863	0.9991
glrlm_ShortRunEmphasis	0.998505	0.982218	0.95	0.998461	0.997903
glrlm_LongRunHighGrayLevelEmphasis	0.992487	0.978473	0.95	0.9983	0.99623
glrlm_RunPercentage	0.996636	0.97947	0.95	0.998539	0.997341
glrlm_RunEntropy	0.991441	0.954503	0.95	0.995137	0.987271
glrlm_HighGrayLevelRunEmphasis	0.998756	0.989674	0.95	0.99863	0.998949
glrlm_RunLengthNonUniformityNormalized	0.997659	0.981306	0.95	0.998938	0.997783
glszm_GrayLevelVariance	0.966412	0.934875	0.9	0.974265	0.979489
glszm_ZoneVariance	0.993768	0.978894	0.95	0.985678	0.912469
glszm_GrayLevelNonUniformityNormalized	0.974875	0.939982	0.9	0.993212	0.986609
glszm_SizeZoneNonUniformityNormalized	0.966001	0.934462	0.9	0.994531	0.977418
glszm_SizeZoneNonUniformity	0.979208	0.923532	0.9	0.997471	0.773916
glszm_LargeAreaEmphasis	0.99376	0.978902	0.95	0.985693	0.912868
glszm_SmallAreaHighGrayLevelEmphasis	0.998506	0.986192	0.95	0.998132	0.998893
glszm_ZonePercentage	0.996015	0.976232	0.95	0.99939	0.997401
glszm_LargeAreaLowGrayLevelEmphasis	0.95717	0.969661	0.95	0.943449	0.946152
glszm_HighGrayLevelZoneEmphasis	0.99827	0.984918	0.95	0.998156	0.998766
glszm_SmallAreaEmphasis	0.961652	0.931477	0.9	0.994013	0.974997
glszm_ZoneEntropy	0.955035	0.927762	0.9	0.961649	0.962987
ngtdm_Complexity	0.975121	0.956079	0.95	0.978768	0.988628
ngtdm_Contrast	0.993324	0.97255	0.95	0.998536	0.993067
ngtdm_Busyness	0.995824	0.937028	0.9	0.965716	0.962321

## Sheet: HASTE
Features	CCC	DR	CCC&DR cutoff	intra_ICC	inter_ICC
shape_Maximum3DDiameter	0.996176	0.975987	0.95	0.996133	0.99236
shape_MajorAxisLength	0.991409	0.965148	0.95	0.990365	0.990481
shape_Elongation	0.930719	0.932844	0.9	0.985227	0.989991
shape_Maximum2DDiameterSlice	0.99991	0.993465	0.95	0.999936	0.999763
shape_SurfaceArea	0.987587	0.962262	0.95	0.988665	0.886025
shape_MinorAxisLength	0.98722	0.962731	0.95	0.988805	0.990027
shape_Maximum2DDiameterColumn	0.992202	0.964986	0.95	0.994568	0.988112
shape_Maximum2DDiameterRow	0.993559	0.969344	0.95	0.993967	0.986232
gldm_DependenceNonUniformityNormalized	0.942445	0.904218	0.9	0.962148	0.945437
glcm_Idmn	0.958242	0.920255	0.9	0.907499	0.935098
glcm_InverseVariance	0.932248	0.904924	0.9	0.959249	0.940863
glcm_Idn	0.972306	0.924508	0.9	0.931914	0.929635
glcm_Correlation	0.948589	0.935617	0.9	0.981544	0.865367
glcm_MCC	0.941738	0.932602	0.9	0.965386	0.93426
glcm_Imc2	0.94596	0.942162	0.9	0.986014	0.921724
glcm_Imc1	0.984445	0.961535	0.95	0.98542	0.988951
firstorder_Skewness	0.954888	0.933558	0.9	0.948203	0.949008
glrlm_ShortRunLowGrayLevelEmphasis	0.957792	0.907861	0.9	0.7655	0.860286
glrlm_LowGrayLevelRunEmphasis	0.946068	0.903624	0.9	0.774279	0.871601
glszm_LargeAreaHighGrayLevelEmphasis	0.958594	0.926342	0.9	0.9802	0.910141
