# Supplementary material for: Impact of rescanning and repositioning on radiomic features employing a multi-object phantom in magnetic resonance imaging
Source: Sci Rep. 2021 Jul 9;11:14248. doi: 10.1038/s41598-021-93756-x (PMC8271025; doi:10.1038/s41598-021-93756-x)
Supplement: Supplementary file 5 — Supplementary Table 2. [file 41598_2021_93756_MOESM5_ESM.xls]

## Sheet: Tabelle1
				equal fruits		unequal fruits		all fruits
sequence	rank	feature class	feature	no. successes		no. successes		no. successes
HASTE	1	shape	shape_Maximum2DDiameterSlice	24	1	96	1	120	1
T2w TSE	2	shape	shape_Maximum2DDiameterSlice	22	0.916667	92	0.958333	114	0.95
T2 map	2	shape	shape_Maximum2DDiameterSlice	22	0.916667	92	0.958333	114	0.95
HASTE	4	shape	shape_MajorAxisLength	20	0.833333	92	0.958333	112	0.933333
T2 map	5	gldm	gldm_DependenceNonUniformityNormalized	17	0.708333	94	0.979167	111	0.925
T2w TSE	6	shape	shape_Maximum3DDiameter	18	0.75	92	0.958333	110	0.916667
T2w TSE	6	shape	shape_Maximum2DDiameterRow	18	0.75	92	0.958333	110	0.916667
FLAIR	6	shape	shape_Maximum2DDiameterSlice	18	0.75	92	0.958333	110	0.916667
FLAIR	6	shape	shape_Maximum2DDiameterRow	18	0.75	92	0.958333	110	0.916667
T2 map	6	firstorder	firstorder_Median	17	0.708333	93	0.96875	110	0.916667
T2 map	11	shape	shape_MajorAxisLength	19	0.791667	90	0.9375	109	0.908333
T2 map	11	glrlm	glrlm_RunPercentage	19	0.791667	90	0.9375	109	0.908333
T1w TSE	11	shape	shape_Maximum2DDiameterSlice	17	0.708333	92	0.958333	109	0.908333
T2 map	11	glcm	glcm_Idm	17	0.708333	92	0.958333	109	0.908333
FLAIR	11	glrlm	glrlm_RunPercentage	16	0.666667	93	0.96875	109	0.908333
T2 map	11	glcm	glcm_Id	16	0.666667	93	0.96875	109	0.908333
T2w TSE	11	shape	shape_Maximum2DDiameterColumn	14	0.583333	95	0.989583	109	0.908333
FLAIR	18	shape	shape_MajorAxisLength	19	0.791667	89	0.927083	108	0.9
T2w TSE	18	shape	shape_MajorAxisLength	18	0.75	90	0.9375	108	0.9
T2 map	18	gldm	gldm_DependenceVariance	17	0.708333	91	0.947917	108	0.9
HASTE	18	shape	shape_Maximum2DDiameterRow	17	0.708333	91	0.947917	108	0.9
T2 map	18	firstorder	firstorder_RootMeanSquared	16	0.666667	92	0.958333	108	0.9
T2 map	18	glrlm	glrlm_GrayLevelNonUniformityNormalized	14	0.583333	94	0.979167	108	0.9
HASTE	24	shape	shape_Maximum3DDiameter	18	0.75	89	0.927083	107	0.891667
T1w TSE	24	shape	shape_Maximum2DDiameterRow	17	0.708333	90	0.9375	107	0.891667
T2 map	24	glrlm	glrlm_ShortRunEmphasis	17	0.708333	90	0.9375	107	0.891667
T2 map	24	glrlm	glrlm_RunLengthNonUniformityNormalized	17	0.708333	90	0.9375	107	0.891667
T1w TSE	24	shape	shape_Maximum2DDiameterColumn	16	0.666667	91	0.947917	107	0.891667
FLAIR	24	gldm	gldm_LargeDependenceEmphasis	16	0.666667	91	0.947917	107	0.891667
T2 map	24	glcm	glcm_DifferenceAverage	16	0.666667	91	0.947917	107	0.891667
T2 map	24	glcm	glcm_DifferenceEntropy	15	0.625	92	0.958333	107	0.891667
T2 map	24	gldm	gldm_SmallDependenceHighGrayLevelEmphasis	14	0.583333	93	0.96875	107	0.891667
T2 map	24	firstorder	firstorder_90Percentile	14	0.583333	93	0.96875	107	0.891667
T2 map	24	glcm	glcm_SumEntropy	11	0.458333	96	1	107	0.891667
T2 map	35	gldm	gldm_LargeDependenceEmphasis	19	0.791667	87	0.90625	106	0.883333
T2 map	35	glrlm	glrlm_RunVariance	17	0.708333	89	0.927083	106	0.883333
T2 map	35	glrlm	glrlm_LongRunEmphasis	17	0.708333	89	0.927083	106	0.883333
T2w TSE	35	glcm	glcm_Imc1	16	0.666667	90	0.9375	106	0.883333
T1w TSE	35	shape	shape_MajorAxisLength	16	0.666667	90	0.9375	106	0.883333
FLAIR	35	glrlm	glrlm_RunVariance	16	0.666667	90	0.9375	106	0.883333
T2 map	35	ngtdm	ngtdm_Contrast	16	0.666667	90	0.9375	106	0.883333
FLAIR	35	glcm	glcm_Id	14	0.583333	92	0.958333	106	0.883333
T2w TSE	35	shape	shape_MinorAxisLength	13	0.541667	93	0.96875	106	0.883333
T2 map	35	glcm	glcm_Idn	13	0.541667	93	0.96875	106	0.883333
T2 map	35	firstorder	firstorder_Entropy	10	0.416667	96	1	106	0.883333
HASTE	35	shape	shape_Maximum2DDiameterColumn	10	0.416667	96	1	106	0.883333
FLAIR	47	shape	shape_Elongation	19	0.791667	86	0.895833	105	0.875
FLAIR	47	glrlm	glrlm_LongRunEmphasis	16	0.666667	89	0.927083	105	0.875
FLAIR	47	shape	shape_Maximum3DDiameter	15	0.625	90	0.9375	105	0.875
FLAIR	47	glcm	glcm_Idm	13	0.541667	92	0.958333	105	0.875
FLAIR	47	shape	shape_MinorAxisLength	12	0.5	93	0.96875	105	0.875
T2 map	47	gldm	gldm_LargeDependenceHighGrayLevelEmphasis	11	0.458333	94	0.979167	105	0.875
T2 map	47	glcm	glcm_InverseVariance	11	0.458333	94	0.979167	105	0.875
FLAIR	54	glrlm	glrlm_ShortRunEmphasis	15	0.625	89	0.927083	104	0.866667
T1w TSE	54	shape	shape_Maximum3DDiameter	14	0.583333	90	0.9375	104	0.866667
FLAIR	54	glrlm	glrlm_RunLengthNonUniformityNormalized	14	0.583333	90	0.9375	104	0.866667
T2 map	54	firstorder	firstorder_Uniformity	14	0.583333	90	0.9375	104	0.866667
T2 map	54	firstorder	firstorder_Mean	14	0.583333	90	0.9375	104	0.866667
T2 map	54	firstorder	firstorder_RobustMeanAbsoluteDeviation	13	0.541667	91	0.947917	104	0.866667
T2w TSE	60	shape	shape_Elongation	22	0.916667	81	0.84375	103	0.858333
FLAIR	60	gldm	gldm_DependenceNonUniformityNormalized	16	0.666667	87	0.90625	103	0.858333
FLAIR	60	gldm	gldm_DependenceVariance	15	0.625	88	0.916667	103	0.858333
T2 map	60	gldm	gldm_SmallDependenceEmphasis	14	0.583333	89	0.927083	103	0.858333
T2 map	60	glcm	glcm_ClusterTendency	11	0.458333	92	0.958333	103	0.858333
HASTE	60	shape	shape_MinorAxisLength	11	0.458333	92	0.958333	103	0.858333
T2 map	60	shape	shape_MinorAxisLength	10	0.416667	93	0.96875	103	0.858333
T2w TSE	67	glcm	glcm_Imc2	13	0.541667	89	0.927083	102	0.85
FLAIR	67	glrlm	glrlm_GrayLevelVariance	13	0.541667	89	0.927083	102	0.85
T2 map	67	firstorder	firstorder_InterquartileRange	11	0.458333	91	0.947917	102	0.85
T2 map	67	gldm	gldm_GrayLevelVariance	10	0.416667	92	0.958333	102	0.85
T2 map	67	firstorder	firstorder_Variance	10	0.416667	92	0.958333	102	0.85
T1w TSE	67	shape	shape_MinorAxisLength	9	0.375	93	0.96875	102	0.85
FLAIR	67	shape	shape_Maximum2DDiameterColumn	9	0.375	93	0.96875	102	0.85
T2w TSE	74	glcm	glcm_Correlation	15	0.625	86	0.895833	101	0.841667
FLAIR	74	glcm	glcm_DifferenceAverage	13	0.541667	88	0.916667	101	0.841667
T2 map	74	shape	shape_Maximum2DDiameterColumn	10	0.416667	91	0.947917	101	0.841667
T2 map	74	glcm	glcm_SumSquares	9	0.375	92	0.958333	101	0.841667
T2 map	74	firstorder	firstorder_MeanAbsoluteDeviation	7	0.291667	94	0.979167	101	0.841667
T2 map	79	glszm	glszm_ZonePercentage	12	0.5	88	0.916667	100	0.833333
T2 map	79	glrlm	glrlm_ShortRunHighGrayLevelEmphasis	11	0.458333	89	0.927083	100	0.833333
T2w TSE	79	glcm	glcm_ClusterShade	6	0.25	94	0.979167	100	0.833333
T2 map	82	shape	shape_Elongation	21	0.875	78	0.8125	99	0.825
HASTE	82	shape	shape_Elongation	19	0.791667	80	0.833333	99	0.825
T2 map	82	glcm	glcm_DifferenceVariance	15	0.625	84	0.875	99	0.825
FLAIR	82	glcm	glcm_DifferenceEntropy	14	0.583333	85	0.885417	99	0.825
FLAIR	82	firstorder	firstorder_Entropy	14	0.583333	85	0.885417	99	0.825
FLAIR	82	glcm	glcm_ClusterProminence	13	0.541667	86	0.895833	99	0.825
FLAIR	82	gldm	gldm_GrayLevelVariance	11	0.458333	88	0.916667	99	0.825
FLAIR	82	firstorder	firstorder_RootMeanSquared	11	0.458333	88	0.916667	99	0.825
FLAIR	82	firstorder	firstorder_Variance	11	0.458333	88	0.916667	99	0.825
FLAIR	82	firstorder	firstorder_90Percentile	10	0.416667	89	0.927083	99	0.825
T2 map	92	glcm	glcm_JointEnergy	17	0.708333	81	0.84375	98	0.816667
T2 map	92	shape	shape_Maximum3DDiameter	13	0.541667	85	0.885417	98	0.816667
T1w TSE	92	gldm	gldm_DependenceVariance	12	0.5	86	0.895833	98	0.816667
FLAIR	92	firstorder	firstorder_Mean	11	0.458333	87	0.90625	98	0.816667
T2 map	92	glcm	glcm_JointEntropy	11	0.458333	87	0.90625	98	0.816667
T2 map	92	glrlm	glrlm_HighGrayLevelRunEmphasis	11	0.458333	87	0.90625	98	0.816667
FLAIR	92	gldm	gldm_LargeDependenceLowGrayLevelEmphasis	10	0.416667	88	0.916667	98	0.816667
T2 map	92	glcm	glcm_JointAverage	10	0.416667	88	0.916667	98	0.816667
T2 map	92	glcm	glcm_SumAverage	10	0.416667	88	0.916667	98	0.816667
T2 map	92	glrlm	glrlm_GrayLevelVariance	9	0.375	89	0.927083	98	0.816667
FLAIR	102	glcm	glcm_Imc1	16	0.666667	81	0.84375	97	0.808333
FLAIR	102	glcm	glcm_SumEntropy	15	0.625	82	0.854167	97	0.808333
T2 map	102	glcm	glcm_Contrast	14	0.583333	83	0.864583	97	0.808333
FLAIR	102	firstorder	firstorder_Median	10	0.416667	87	0.90625	97	0.808333
T2 map	102	gldm	gldm_HighGrayLevelEmphasis	10	0.416667	87	0.90625	97	0.808333
T2 map	102	glcm	glcm_Autocorrelation	10	0.416667	87	0.90625	97	0.808333
T2 map	102	glrlm	glrlm_RunEntropy	8	0.333333	89	0.927083	97	0.808333
T2 map	102	glszm	glszm_LargeAreaLowGrayLevelEmphasis	8	0.333333	89	0.927083	97	0.808333
FLAIR	102	ngtdm	ngtdm_Contrast	3	0.125	94	0.979167	97	0.808333
FLAIR	111	gldm	gldm_SmallDependenceEmphasis	14	0.583333	82	0.854167	96	0.8
FLAIR	111	glcm	glcm_Contrast	13	0.541667	83	0.864583	96	0.8
FLAIR	111	glszm	glszm_GrayLevelNonUniformityNormalized	13	0.541667	83	0.864583	96	0.8
FLAIR	111	glcm	glcm_SumSquares	11	0.458333	85	0.885417	96	0.8
FLAIR	111	glrlm	glrlm_LongRunLowGrayLevelEmphasis	11	0.458333	85	0.885417	96	0.8
T2 map	111	glcm	glcm_Imc1	10	0.416667	86	0.895833	96	0.8
T2 map	117	glcm	glcm_Idmn	14	0.583333	81	0.84375	95	0.791667
FLAIR	117	glrlm	glrlm_GrayLevelNonUniformityNormalized	13	0.541667	82	0.854167	95	0.791667
T1w TSE	117	firstorder	firstorder_Minimum	12	0.5	83	0.864583	95	0.791667
FLAIR	117	glrlm	glrlm_RunEntropy	12	0.5	83	0.864583	95	0.791667
FLAIR	117	firstorder	firstorder_MeanAbsoluteDeviation	12	0.5	83	0.864583	95	0.791667
T2 map	117	shape	shape_Maximum2DDiameterRow	12	0.5	83	0.864583	95	0.791667
FLAIR	117	glcm	glcm_ClusterTendency	11	0.458333	84	0.875	95	0.791667
FLAIR	117	gldm	gldm_HighGrayLevelEmphasis	10	0.416667	85	0.885417	95	0.791667
FLAIR	117	glcm	glcm_Autocorrelation	10	0.416667	85	0.885417	95	0.791667
FLAIR	117	glrlm	glrlm_HighGrayLevelRunEmphasis	10	0.416667	85	0.885417	95	0.791667
FLAIR	127	glcm	glcm_MaximumProbability	17	0.708333	77	0.802083	94	0.783333
FLAIR	127	firstorder	firstorder_InterquartileRange	13	0.541667	81	0.84375	94	0.783333
FLAIR	127	firstorder	firstorder_RobustMeanAbsoluteDeviation	13	0.541667	81	0.84375	94	0.783333
T2 map	127	glszm	glszm_SmallAreaHighGrayLevelEmphasis	11	0.458333	83	0.864583	94	0.783333
T2 map	127	glcm	glcm_ClusterShade	8	0.333333	86	0.895833	94	0.783333
FLAIR	132	glcm	glcm_MCC	13	0.541667	80	0.833333	93	0.775
FLAIR	132	firstorder	firstorder_Maximum	13	0.541667	80	0.833333	93	0.775
FLAIR	132	firstorder	firstorder_Uniformity	12	0.5	81	0.84375	93	0.775
T2w TSE	132	glcm	glcm_MCC	10	0.416667	83	0.864583	93	0.775
FLAIR	132	glcm	glcm_JointAverage	10	0.416667	83	0.864583	93	0.775
FLAIR	132	glcm	glcm_SumAverage	10	0.416667	83	0.864583	93	0.775
T2w TSE	132	gldm	gldm_LargeDependenceHighGrayLevelEmphasis	9	0.375	84	0.875	93	0.775
T2 map	132	glszm	glszm_LargeAreaHighGrayLevelEmphasis	9	0.375	84	0.875	93	0.775
T2 map	132	glrlm	glrlm_LongRunHighGrayLevelEmphasis	8	0.333333	85	0.885417	93	0.775
FLAIR	132	firstorder	firstorder_10Percentile	7	0.291667	86	0.895833	93	0.775
T2 map	132	firstorder	firstorder_10Percentile	6	0.25	87	0.90625	93	0.775
T2 map	132	firstorder	firstorder_Minimum	5	0.208333	88	0.916667	93	0.775
FLAIR	144	glszm	glszm_ZonePercentage	13	0.541667	79	0.822917	92	0.766667
FLAIR	144	glcm	glcm_JointEntropy	9	0.375	83	0.864583	92	0.766667
T2 map	144	gldm	gldm_DependenceEntropy	8	0.333333	84	0.875	92	0.766667
T2w TSE	144	firstorder	firstorder_Median	2	0.0833333	90	0.9375	92	0.766667
HASTE	144	gldm	gldm_LargeDependenceHighGrayLevelEmphasis	2	0.0833333	90	0.9375	92	0.766667
T2 map	149	glcm	glcm_MaximumProbability	15	0.625	76	0.791667	91	0.758333
FLAIR	149	glcm	glcm_Imc2	14	0.583333	77	0.802083	91	0.758333
FLAIR	149	glszm	glszm_HighGrayLevelZoneEmphasis	13	0.541667	78	0.8125	91	0.758333
FLAIR	149	gldm	gldm_SmallDependenceHighGrayLevelEmphasis	12	0.5	79	0.822917	91	0.758333
T2 map	149	glszm	glszm_HighGrayLevelZoneEmphasis	12	0.5	79	0.822917	91	0.758333
T2 map	149	glszm	glszm_ZoneVariance	10	0.416667	81	0.84375	91	0.758333
T2 map	149	glszm	glszm_LargeAreaEmphasis	10	0.416667	81	0.84375	91	0.758333
T2w TSE	149	firstorder	firstorder_Skewness	9	0.375	82	0.854167	91	0.758333
T2 map	149	firstorder	firstorder_Skewness	9	0.375	82	0.854167	91	0.758333
T2 map	149	gldm	gldm_GrayLevelNonUniformity	7	0.291667	84	0.875	91	0.758333
FLAIR	149	gldm	gldm_LargeDependenceHighGrayLevelEmphasis	5	0.208333	86	0.895833	91	0.758333
T1w TSE	160	shape	shape_Elongation	17	0.708333	73	0.760417	90	0.75
FLAIR	160	glcm	glcm_JointEnergy	12	0.5	78	0.8125	90	0.75
FLAIR	160	glcm	glcm_Correlation	11	0.458333	79	0.822917	90	0.75
FLAIR	160	glrlm	glrlm_LowGrayLevelRunEmphasis	11	0.458333	79	0.822917	90	0.75
FLAIR	160	glszm	glszm_SmallAreaHighGrayLevelEmphasis	10	0.416667	80	0.833333	90	0.75
HASTE	160	glszm	glszm_SmallAreaLowGrayLevelEmphasis	3	0.125	87	0.90625	90	0.75
HASTE	160	glszm	glszm_LowGrayLevelZoneEmphasis	1	0.0416667	89	0.927083	90	0.75
T2w TSE	160	firstorder	firstorder_Mean	0	0	90	0.9375	90	0.75
T2 map	168	glcm	glcm_Correlation	14	0.583333	75	0.78125	89	0.741667
FLAIR	168	glcm	glcm_DifferenceVariance	11	0.458333	78	0.8125	89	0.741667
FLAIR	168	gldm	gldm_LowGrayLevelEmphasis	10	0.416667	79	0.822917	89	0.741667
T2 map	168	glcm	glcm_MCC	10	0.416667	79	0.822917	89	0.741667
HASTE	168	glcm	glcm_Imc1	10	0.416667	79	0.822917	89	0.741667
T2w TSE	168	firstorder	firstorder_10Percentile	4	0.166667	85	0.885417	89	0.741667
FLAIR	174	glszm	glszm_GrayLevelVariance	14	0.583333	74	0.770833	88	0.733333
T1w TSE	174	glcm	glcm_InverseVariance	10	0.416667	78	0.8125	88	0.733333
HASTE	174	glcm	glcm_Idmn	9	0.375	79	0.822917	88	0.733333
T2w TSE	174	glrlm	glrlm_RunVariance	5	0.208333	83	0.864583	88	0.733333
T2w TSE	174	glrlm	glrlm_LongRunEmphasis	5	0.208333	83	0.864583	88	0.733333
T2 map	174	glrlm	glrlm_GrayLevelNonUniformity	4	0.166667	84	0.875	88	0.733333
T2w TSE	174	glcm	glcm_DifferenceEntropy	3	0.125	85	0.885417	88	0.733333
T2w TSE	174	glszm	glszm_LargeAreaLowGrayLevelEmphasis	3	0.125	85	0.885417	88	0.733333
FLAIR	182	gldm	gldm_DependenceEntropy	10	0.416667	77	0.802083	87	0.725
FLAIR	182	glrlm	glrlm_ShortRunHighGrayLevelEmphasis	10	0.416667	77	0.802083	87	0.725
FLAIR	182	firstorder	firstorder_Kurtosis	10	0.416667	77	0.802083	87	0.725
T2 map	182	firstorder	firstorder_Kurtosis	9	0.375	78	0.8125	87	0.725
T2w TSE	182	ngtdm	ngtdm_Contrast	8	0.333333	79	0.822917	87	0.725
T2w TSE	182	gldm	gldm_DependenceNonUniformityNormalized	6	0.25	81	0.84375	87	0.725
T2w TSE	182	gldm	gldm_LargeDependenceEmphasis	6	0.25	81	0.84375	87	0.725
T2w TSE	182	glrlm	glrlm_RunPercentage	5	0.208333	82	0.854167	87	0.725
T2w TSE	182	glcm	glcm_DifferenceAverage	2	0.0833333	85	0.885417	87	0.725
T2w TSE	182	firstorder	firstorder_RootMeanSquared	0	0	87	0.90625	87	0.725
T2w TSE	182	firstorder	firstorder_90Percentile	0	0	87	0.90625	87	0.725
T2 map	193	glcm	glcm_Imc2	12	0.5	74	0.770833	86	0.716667
T2 map	193	glszm	glszm_GrayLevelNonUniformityNormalized	10	0.416667	76	0.791667	86	0.716667
T2w TSE	193	shape	shape_SurfaceArea	6	0.25	80	0.833333	86	0.716667
FLAIR	193	glrlm	glrlm_LongRunHighGrayLevelEmphasis	6	0.25	80	0.833333	86	0.716667
T2w TSE	193	glcm	glcm_Id	4	0.166667	82	0.854167	86	0.716667
T2w TSE	193	glszm	glszm_ZonePercentage	4	0.166667	82	0.854167	86	0.716667
T2w TSE	193	gldm	gldm_SmallDependenceEmphasis	3	0.125	83	0.864583	86	0.716667
T1w TSE	200	glcm	glcm_Imc1	13	0.541667	72	0.75	85	0.708333
T2 map	200	ngtdm	ngtdm_Complexity	12	0.5	73	0.760417	85	0.708333
T1w TSE	200	glrlm	glrlm_RunPercentage	10	0.416667	75	0.78125	85	0.708333
T2 map	200	glszm	glszm_ZoneEntropy	9	0.375	76	0.791667	85	0.708333
T1w TSE	200	glcm	glcm_DifferenceAverage	8	0.333333	77	0.802083	85	0.708333
FLAIR	200	glszm	glszm_LargeAreaLowGrayLevelEmphasis	8	0.333333	77	0.802083	85	0.708333
T2 map	200	glszm	glszm_GrayLevelVariance	7	0.291667	78	0.8125	85	0.708333
T2w TSE	200	glszm	glszm_ZoneVariance	6	0.25	79	0.822917	85	0.708333
T2w TSE	200	glszm	glszm_LargeAreaEmphasis	6	0.25	79	0.822917	85	0.708333
T2w TSE	200	glcm	glcm_Idm	4	0.166667	81	0.84375	85	0.708333
T2w TSE	200	glcm	glcm_ClusterProminence	4	0.166667	81	0.84375	85	0.708333
T2w TSE	200	glrlm	glrlm_ShortRunEmphasis	4	0.166667	81	0.84375	85	0.708333
T2w TSE	200	glrlm	glrlm_RunLengthNonUniformityNormalized	4	0.166667	81	0.84375	85	0.708333
T2w TSE	200	glszm	glszm_LowGrayLevelZoneEmphasis	4	0.166667	81	0.84375	85	0.708333
HASTE	200	glrlm	glrlm_ShortRunLowGrayLevelEmphasis	4	0.166667	81	0.84375	85	0.708333
HASTE	200	glrlm	glrlm_LowGrayLevelRunEmphasis	4	0.166667	81	0.84375	85	0.708333
T2 map	200	glszm	glszm_LowGrayLevelZoneEmphasis	3	0.125	82	0.854167	85	0.708333
T2w TSE	200	glcm	glcm_Contrast	2	0.0833333	83	0.864583	85	0.708333
T1w TSE	218	glrlm	glrlm_LongRunEmphasis	10	0.416667	74	0.770833	84	0.7
T1w TSE	218	gldm	gldm_LargeDependenceLowGrayLevelEmphasis	9	0.375	75	0.78125	84	0.7
T1w TSE	218	glcm	glcm_DifferenceEntropy	8	0.333333	76	0.791667	84	0.7
HASTE	218	glszm	glszm_LargeAreaHighGrayLevelEmphasis	5	0.208333	79	0.822917	84	0.7
HASTE	218	glcm	glcm_DifferenceEntropy	4	0.166667	80	0.833333	84	0.7
T2 map	218	glszm	glszm_SmallAreaLowGrayLevelEmphasis	3	0.125	81	0.84375	84	0.7
T2w TSE	218	glrlm	glrlm_ShortRunHighGrayLevelEmphasis	1	0.0416667	83	0.864583	84	0.7
T2w TSE	218	gldm	gldm_SmallDependenceHighGrayLevelEmphasis	0	0	84	0.875	84	0.7
T2w TSE	226	firstorder	firstorder_Kurtosis	11	0.458333	72	0.75	83	0.691667
HASTE	226	glcm	glcm_Idn	9	0.375	74	0.770833	83	0.691667
T1w TSE	226	glrlm	glrlm_RunVariance	8	0.333333	75	0.78125	83	0.691667
T1w TSE	226	glrlm	glrlm_RunLengthNonUniformityNormalized	8	0.333333	75	0.78125	83	0.691667
T2w TSE	226	glszm	glszm_SmallAreaLowGrayLevelEmphasis	3	0.125	80	0.833333	83	0.691667
FLAIR	226	shape	shape_SurfaceArea	3	0.125	80	0.833333	83	0.691667
HASTE	226	shape	shape_SurfaceArea	3	0.125	80	0.833333	83	0.691667
T2w TSE	226	glcm	glcm_DifferenceVariance	2	0.0833333	81	0.84375	83	0.691667
FLAIR	234	glcm	glcm_InverseVariance	17	0.708333	65	0.677083	82	0.683333
T1w TSE	234	gldm	gldm_LargeDependenceEmphasis	10	0.416667	72	0.75	82	0.683333
T2w TSE	234	gldm	gldm_DependenceVariance	8	0.333333	74	0.770833	82	0.683333
T1w TSE	234	glrlm	glrlm_ShortRunEmphasis	8	0.333333	74	0.770833	82	0.683333
T1w TSE	234	gldm	gldm_LargeDependenceHighGrayLevelEmphasis	7	0.291667	75	0.78125	82	0.683333
FLAIR	234	gldm	gldm_GrayLevelNonUniformity	7	0.291667	75	0.78125	82	0.683333
T2 map	234	glcm	glcm_ClusterProminence	7	0.291667	75	0.78125	82	0.683333
FLAIR	234	glszm	glszm_ZoneVariance	6	0.25	76	0.791667	82	0.683333
FLAIR	234	glszm	glszm_LargeAreaEmphasis	6	0.25	76	0.791667	82	0.683333
T2w TSE	234	glcm	glcm_InverseVariance	5	0.208333	77	0.802083	82	0.683333
T2w TSE	244	glcm	glcm_Idn	13	0.541667	68	0.708333	81	0.675
HASTE	244	glcm	glcm_Imc2	9	0.375	72	0.75	81	0.675
T2 map	244	glszm	glszm_SmallAreaEmphasis	8	0.333333	73	0.760417	81	0.675
HASTE	244	glcm	glcm_Idm	5	0.208333	76	0.791667	81	0.675
HASTE	244	glcm	glcm_Id	5	0.208333	76	0.791667	81	0.675
T2w TSE	244	glcm	glcm_JointEntropy	3	0.125	78	0.8125	81	0.675
HASTE	244	glcm	glcm_DifferenceAverage	3	0.125	78	0.8125	81	0.675
T1w TSE	251	gldm	gldm_SmallDependenceEmphasis	8	0.333333	72	0.75	80	0.666667
T1w TSE	251	glcm	glcm_Idm	8	0.333333	72	0.75	80	0.666667
T1w TSE	251	glcm	glcm_Id	8	0.333333	72	0.75	80	0.666667
T1w TSE	251	glrlm	glrlm_LongRunHighGrayLevelEmphasis	8	0.333333	72	0.75	80	0.666667
FLAIR	251	ngtdm	ngtdm_Busyness	8	0.333333	72	0.75	80	0.666667
T2 map	251	glszm	glszm_SizeZoneNonUniformityNormalized	8	0.333333	72	0.75	80	0.666667
T1w TSE	251	glcm	glcm_Contrast	7	0.291667	73	0.760417	80	0.666667
FLAIR	251	glszm	glszm_SizeZoneNonUniformityNormalized	7	0.291667	73	0.760417	80	0.666667
FLAIR	251	glszm	glszm_SmallAreaEmphasis	7	0.291667	73	0.760417	80	0.666667
HASTE	251	glcm	glcm_MCC	7	0.291667	73	0.760417	80	0.666667
HASTE	251	gldm	gldm_LargeDependenceEmphasis	5	0.208333	75	0.78125	80	0.666667
HASTE	251	gldm	gldm_LowGrayLevelEmphasis	4	0.166667	76	0.791667	80	0.666667
T2 map	251	ngtdm	ngtdm_Busyness	3	0.125	77	0.802083	80	0.666667
T2w TSE	264	glcm	glcm_Idmn	13	0.541667	66	0.6875	79	0.658333
T2w TSE	264	glszm	glszm_LargeAreaHighGrayLevelEmphasis	8	0.333333	71	0.739583	79	0.658333
T1w TSE	264	glrlm	glrlm_LongRunLowGrayLevelEmphasis	8	0.333333	71	0.739583	79	0.658333
HASTE	264	gldm	gldm_DependenceNonUniformityNormalized	5	0.208333	74	0.770833	79	0.658333
HASTE	264	glrlm	glrlm_RunVariance	4	0.166667	75	0.78125	79	0.658333
HASTE	264	glrlm	glrlm_LongRunEmphasis	4	0.166667	75	0.78125	79	0.658333
T2w TSE	264	gldm	gldm_GrayLevelNonUniformity	3	0.125	76	0.791667	79	0.658333
T2 map	264	shape	shape_SurfaceArea	3	0.125	76	0.791667	79	0.658333
HASTE	264	shape	shape_VoxelVolume	3	0.125	76	0.791667	79	0.658333
HASTE	264	shape	shape_MeshVolume	3	0.125	76	0.791667	79	0.658333
T2w TSE	264	glcm	glcm_JointAverage	0	0	79	0.822917	79	0.658333
T2w TSE	264	glcm	glcm_SumAverage	0	0	79	0.822917	79	0.658333
T1w TSE	276	glszm	glszm_LargeAreaLowGrayLevelEmphasis	5	0.208333	73	0.760417	78	0.65
T1w TSE	276	glrlm	glrlm_GrayLevelNonUniformity	4	0.166667	74	0.770833	78	0.65
FLAIR	276	glszm	glszm_LargeAreaHighGrayLevelEmphasis	4	0.166667	74	0.770833	78	0.65
HASTE	276	glrlm	glrlm_RunLengthNonUniformityNormalized	4	0.166667	74	0.770833	78	0.65
HASTE	276	glrlm	glrlm_RunPercentage	3	0.125	75	0.78125	78	0.65
HASTE	276	ngtdm	ngtdm_Complexity	2	0.0833333	76	0.791667	78	0.65
HASTE	276	glrlm	glrlm_LongRunHighGrayLevelEmphasis	1	0.0416667	77	0.802083	78	0.65
T2w TSE	276	gldm	gldm_HighGrayLevelEmphasis	0	0	78	0.8125	78	0.65
T2w TSE	276	glrlm	glrlm_HighGrayLevelRunEmphasis	0	0	78	0.8125	78	0.65
HASTE	276	glcm	glcm_Contrast	0	0	78	0.8125	78	0.65
FLAIR	286	ngtdm	ngtdm_Complexity	11	0.458333	66	0.6875	77	0.641667
T2 map	286	firstorder	firstorder_Maximum	7	0.291667	70	0.729167	77	0.641667
HASTE	286	gldm	gldm_DependenceVariance	6	0.25	71	0.739583	77	0.641667
T2w TSE	286	firstorder	firstorder_MeanAbsoluteDeviation	4	0.166667	73	0.760417	77	0.641667
T2w TSE	286	glcm	glcm_JointEnergy	3	0.125	74	0.770833	77	0.641667
HASTE	286	glrlm	glrlm_ShortRunEmphasis	3	0.125	74	0.770833	77	0.641667
HASTE	286	glcm	glcm_InverseVariance	2	0.0833333	75	0.78125	77	0.641667
HASTE	286	gldm	gldm_SmallDependenceEmphasis	1	0.0416667	76	0.791667	77	0.641667
HASTE	286	glszm	glszm_SmallAreaHighGrayLevelEmphasis	1	0.0416667	76	0.791667	77	0.641667
T2w TSE	286	glcm	glcm_Autocorrelation	0	0	77	0.802083	77	0.641667
T2w TSE	286	glszm	glszm_HighGrayLevelZoneEmphasis	0	0	77	0.802083	77	0.641667
T2w TSE	297	gldm	gldm_SmallDependenceLowGrayLevelEmphasis	13	0.541667	63	0.65625	76	0.633333
FLAIR	297	glrlm	glrlm_ShortRunLowGrayLevelEmphasis	11	0.458333	65	0.677083	76	0.633333
FLAIR	297	firstorder	firstorder_Minimum	8	0.333333	68	0.708333	76	0.633333
T1w TSE	297	glrlm	glrlm_RunEntropy	7	0.291667	69	0.71875	76	0.633333
HASTE	297	firstorder	firstorder_Minimum	4	0.166667	72	0.75	76	0.633333
HASTE	297	gldm	gldm_GrayLevelNonUniformity	3	0.125	73	0.760417	76	0.633333
HASTE	297	glcm	glcm_Correlation	3	0.125	73	0.760417	76	0.633333
T2w TSE	297	gldm	gldm_GrayLevelVariance	2	0.0833333	74	0.770833	76	0.633333
T2w TSE	297	firstorder	firstorder_Variance	2	0.0833333	74	0.770833	76	0.633333
HASTE	297	gldm	gldm_SmallDependenceLowGrayLevelEmphasis	2	0.0833333	74	0.770833	76	0.633333
HASTE	297	glszm	glszm_ZonePercentage	0	0	76	0.791667	76	0.633333
T2 map	308	firstorder	firstorder_Range	13	0.541667	62	0.645833	75	0.625
T1w TSE	308	glcm	glcm_DifferenceVariance	7	0.291667	68	0.708333	75	0.625
T1w TSE	308	glszm	glszm_SmallAreaLowGrayLevelEmphasis	7	0.291667	68	0.708333	75	0.625
HASTE	308	glrlm	glrlm_LongRunLowGrayLevelEmphasis	4	0.166667	71	0.739583	75	0.625
HASTE	308	glszm	glszm_ZoneVariance	3	0.125	72	0.75	75	0.625
HASTE	308	glszm	glszm_LargeAreaEmphasis	3	0.125	72	0.75	75	0.625
T2w TSE	308	glszm	glszm_GrayLevelNonUniformityNormalized	0	0	75	0.78125	75	0.625
FLAIR	315	firstorder	firstorder_Range	12	0.5	62	0.645833	74	0.616667
T1w TSE	315	glszm	glszm_HighGrayLevelZoneEmphasis	7	0.291667	67	0.697917	74	0.616667
T1w TSE	315	gldm	gldm_SmallDependenceHighGrayLevelEmphasis	6	0.25	68	0.708333	74	0.616667
T2w TSE	315	glcm	glcm_MaximumProbability	5	0.208333	69	0.71875	74	0.616667
T2w TSE	315	glrlm	glrlm_GrayLevelNonUniformity	5	0.208333	69	0.71875	74	0.616667
T1w TSE	315	glszm	glszm_ZoneVariance	4	0.166667	70	0.729167	74	0.616667
T1w TSE	315	glszm	glszm_LargeAreaEmphasis	4	0.166667	70	0.729167	74	0.616667
T2w TSE	315	shape	shape_VoxelVolume	3	0.125	71	0.739583	74	0.616667
T2w TSE	315	shape	shape_MeshVolume	3	0.125	71	0.739583	74	0.616667
T2w TSE	315	glcm	glcm_ClusterTendency	3	0.125	71	0.739583	74	0.616667
FLAIR	315	shape	shape_VoxelVolume	3	0.125	71	0.739583	74	0.616667
FLAIR	315	shape	shape_MeshVolume	3	0.125	71	0.739583	74	0.616667
T2w TSE	315	glcm	glcm_SumSquares	2	0.0833333	72	0.75	74	0.616667
HASTE	315	glszm	glszm_HighGrayLevelZoneEmphasis	1	0.0416667	73	0.760417	74	0.616667
T1w TSE	329	glszm	glszm_ZonePercentage	5	0.208333	68	0.708333	73	0.608333
FLAIR	329	glszm	glszm_SizeZoneNonUniformity	4	0.166667	69	0.71875	73	0.608333
HASTE	329	glcm	glcm_JointAverage	0	0	73	0.760417	73	0.608333
HASTE	329	glcm	glcm_SumAverage	0	0	73	0.760417	73	0.608333
HASTE	329	glcm	glcm_DifferenceVariance	0	0	73	0.760417	73	0.608333
FLAIR	334	glszm	glszm_SmallAreaLowGrayLevelEmphasis	10	0.416667	62	0.645833	72	0.6
T1w TSE	334	ngtdm	ngtdm_Strength	8	0.333333	64	0.666667	72	0.6
T1w TSE	334	shape	shape_SurfaceArea	6	0.25	66	0.6875	72	0.6
T1w TSE	334	glcm	glcm_Idn	5	0.208333	67	0.697917	72	0.6
T2w TSE	334	glrlm	glrlm_GrayLevelVariance	3	0.125	69	0.71875	72	0.6
T1w TSE	334	firstorder	firstorder_Median	3	0.125	69	0.71875	72	0.6
T1w TSE	340	glszm	glszm_ZoneEntropy	8	0.333333	63	0.65625	71	0.591667
T2w TSE	340	glrlm	glrlm_ShortRunLowGrayLevelEmphasis	7	0.291667	64	0.666667	71	0.591667
T1w TSE	340	glszm	glszm_SmallAreaHighGrayLevelEmphasis	7	0.291667	64	0.666667	71	0.591667
T2w TSE	340	firstorder	firstorder_RobustMeanAbsoluteDeviation	6	0.25	65	0.677083	71	0.591667
T1w TSE	340	gldm	gldm_HighGrayLevelEmphasis	5	0.208333	66	0.6875	71	0.591667
T1w TSE	340	glrlm	glrlm_ShortRunHighGrayLevelEmphasis	5	0.208333	66	0.6875	71	0.591667
T2 map	340	gldm	gldm_LargeDependenceLowGrayLevelEmphasis	5	0.208333	66	0.6875	71	0.591667
T2 map	340	gldm	gldm_SmallDependenceLowGrayLevelEmphasis	4	0.166667	67	0.697917	71	0.591667
T1w TSE	340	shape	shape_VoxelVolume	3	0.125	68	0.708333	71	0.591667
T1w TSE	340	shape	shape_MeshVolume	3	0.125	68	0.708333	71	0.591667
T1w TSE	340	gldm	gldm_GrayLevelNonUniformity	3	0.125	68	0.708333	71	0.591667
T2 map	340	firstorder	firstorder_Energy	1	0.0416667	70	0.729167	71	0.591667
T2 map	340	firstorder	firstorder_TotalEnergy	1	0.0416667	70	0.729167	71	0.591667
T2w TSE	353	gldm	gldm_LowGrayLevelEmphasis	10	0.416667	60	0.625	70	0.583333
FLAIR	353	glszm	glszm_LowGrayLevelZoneEmphasis	8	0.333333	62	0.645833	70	0.583333
T2w TSE	353	glrlm	glrlm_LowGrayLevelRunEmphasis	7	0.291667	63	0.65625	70	0.583333
T1w TSE	353	glszm	glszm_SizeZoneNonUniformityNormalized	6	0.25	64	0.666667	70	0.583333
T2w TSE	353	firstorder	firstorder_InterquartileRange	5	0.208333	65	0.677083	70	0.583333
FLAIR	353	glrlm	glrlm_GrayLevelNonUniformity	5	0.208333	65	0.677083	70	0.583333
T2w TSE	353	glszm	glszm_SizeZoneNonUniformityNormalized	4	0.166667	66	0.6875	70	0.583333
T2w TSE	353	glszm	glszm_SmallAreaEmphasis	4	0.166667	66	0.6875	70	0.583333
T1w TSE	353	glcm	glcm_Autocorrelation	4	0.166667	66	0.6875	70	0.583333
T1w TSE	353	ngtdm	ngtdm_Coarseness	3	0.125	67	0.697917	70	0.583333
HASTE	353	gldm	gldm_HighGrayLevelEmphasis	0	0	70	0.729167	70	0.583333
HASTE	353	gldm	gldm_SmallDependenceHighGrayLevelEmphasis	0	0	70	0.729167	70	0.583333
HASTE	353	glcm	glcm_Autocorrelation	0	0	70	0.729167	70	0.583333
T1w TSE	366	gldm	gldm_LowGrayLevelEmphasis	7	0.291667	62	0.645833	69	0.575
T1w TSE	366	glszm	glszm_SmallAreaEmphasis	6	0.25	63	0.65625	69	0.575
T2w TSE	366	glrlm	glrlm_GrayLevelNonUniformityNormalized	5	0.208333	64	0.666667	69	0.575
T2w TSE	366	glcm	glcm_SumEntropy	4	0.166667	65	0.677083	69	0.575
T1w TSE	366	glcm	glcm_JointAverage	4	0.166667	65	0.677083	69	0.575
T1w TSE	366	glcm	glcm_SumAverage	4	0.166667	65	0.677083	69	0.575
T2w TSE	366	firstorder	firstorder_Entropy	3	0.125	66	0.6875	69	0.575
T1w TSE	366	firstorder	firstorder_RootMeanSquared	3	0.125	66	0.6875	69	0.575
HASTE	366	glrlm	glrlm_GrayLevelNonUniformity	2	0.0833333	67	0.697917	69	0.575
HASTE	366	firstorder	firstorder_Range	2	0.0833333	67	0.697917	69	0.575
HASTE	366	glszm	glszm_LargeAreaLowGrayLevelEmphasis	1	0.0416667	68	0.708333	69	0.575
T2w TSE	366	glszm	glszm_SmallAreaHighGrayLevelEmphasis	0	0	69	0.71875	69	0.575
HASTE	366	glrlm	glrlm_ShortRunHighGrayLevelEmphasis	0	0	69	0.71875	69	0.575
HASTE	366	glrlm	glrlm_HighGrayLevelRunEmphasis	0	0	69	0.71875	69	0.575
FLAIR	380	glszm	glszm_ZoneEntropy	13	0.541667	55	0.572917	68	0.566667
FLAIR	380	firstorder	firstorder_Skewness	12	0.5	56	0.583333	68	0.566667
FLAIR	380	glcm	glcm_Idn	7	0.291667	61	0.635417	68	0.566667
T1w TSE	380	gldm	gldm_DependenceNonUniformity	4	0.166667	64	0.666667	68	0.566667
HASTE	380	ngtdm	ngtdm_Contrast	4	0.166667	64	0.666667	68	0.566667
T2w TSE	380	ngtdm	ngtdm_Strength	3	0.125	65	0.677083	68	0.566667
T2w TSE	380	firstorder	firstorder_Uniformity	3	0.125	65	0.677083	68	0.566667
HASTE	380	glcm	glcm_JointEntropy	2	0.0833333	66	0.6875	68	0.566667
HASTE	380	glcm	glcm_MaximumProbability	2	0.0833333	66	0.6875	68	0.566667
T2w TSE	389	gldm	gldm_LargeDependenceLowGrayLevelEmphasis	9	0.375	58	0.604167	67	0.558333
T2w TSE	389	glrlm	glrlm_LongRunLowGrayLevelEmphasis	9	0.375	58	0.604167	67	0.558333
T1w TSE	389	glrlm	glrlm_LowGrayLevelRunEmphasis	8	0.333333	59	0.614583	67	0.558333
T1w TSE	389	firstorder	firstorder_Range	8	0.333333	59	0.614583	67	0.558333
T1w TSE	389	glrlm	glrlm_HighGrayLevelRunEmphasis	5	0.208333	62	0.645833	67	0.558333
T1w TSE	389	firstorder	firstorder_90Percentile	4	0.166667	63	0.65625	67	0.558333
T1w TSE	389	firstorder	firstorder_Mean	3	0.125	64	0.666667	67	0.558333
HASTE	389	glszm	glszm_GrayLevelNonUniformityNormalized	1	0.0416667	66	0.6875	67	0.558333
T1w TSE	397	glcm	glcm_Imc2	8	0.333333	58	0.604167	66	0.55
T1w TSE	397	glcm	glcm_MaximumProbability	7	0.291667	59	0.614583	66	0.55
T1w TSE	397	gldm	gldm_SmallDependenceLowGrayLevelEmphasis	6	0.25	60	0.625	66	0.55
T1w TSE	397	glszm	glszm_LowGrayLevelZoneEmphasis	6	0.25	60	0.625	66	0.55
FLAIR	397	firstorder	firstorder_Energy	6	0.25	60	0.625	66	0.55
FLAIR	397	firstorder	firstorder_TotalEnergy	6	0.25	60	0.625	66	0.55
FLAIR	397	ngtdm	ngtdm_Coarseness	5	0.208333	61	0.635417	66	0.55
T2w TSE	397	glrlm	glrlm_RunEntropy	4	0.166667	62	0.645833	66	0.55
T2w TSE	397	glszm	glszm_GrayLevelVariance	4	0.166667	62	0.645833	66	0.55
HASTE	397	glcm	glcm_JointEnergy	2	0.0833333	64	0.666667	66	0.55
T2w TSE	407	firstorder	firstorder_Maximum	5	0.208333	60	0.625	65	0.541667
T1w TSE	407	gldm	gldm_DependenceNonUniformityNormalized	5	0.208333	60	0.625	65	0.541667
HASTE	407	glszm	glszm_GrayLevelVariance	1	0.0416667	64	0.666667	65	0.541667
FLAIR	410	glcm	glcm_Idmn	6	0.25	58	0.604167	64	0.533333
T1w TSE	410	glcm	glcm_ClusterShade	5	0.208333	59	0.614583	64	0.533333
T2 map	410	shape	shape_VoxelVolume	1	0.0416667	63	0.65625	64	0.533333
T2 map	410	shape	shape_MeshVolume	1	0.0416667	63	0.65625	64	0.533333
T2 map	410	glszm	glszm_SizeZoneNonUniformity	0	0	64	0.666667	64	0.533333
FLAIR	415	glcm	glcm_ClusterShade	10	0.416667	53	0.552083	63	0.525
T2w TSE	415	firstorder	firstorder_Range	5	0.208333	58	0.604167	63	0.525
T2w TSE	415	glrlm	glrlm_LongRunHighGrayLevelEmphasis	4	0.166667	59	0.614583	63	0.525
HASTE	415	firstorder	firstorder_Skewness	2	0.0833333	61	0.635417	63	0.525
HASTE	415	glcm	glcm_ClusterShade	1	0.0416667	62	0.645833	63	0.525
T1w TSE	420	glcm	glcm_Idmn	6	0.25	56	0.583333	62	0.516667
HASTE	420	gldm	gldm_LargeDependenceLowGrayLevelEmphasis	5	0.208333	57	0.59375	62	0.516667
T2 map	420	glrlm	glrlm_LongRunLowGrayLevelEmphasis	4	0.166667	58	0.604167	62	0.516667
HASTE	420	glszm	glszm_SizeZoneNonUniformity	4	0.166667	58	0.604167	62	0.516667
T1w TSE	424	ngtdm	ngtdm_Busyness	8	0.333333	53	0.552083	61	0.508333
T2w TSE	424	ngtdm	ngtdm_Busyness	3	0.125	58	0.604167	61	0.508333
T1w TSE	426	firstorder	firstorder_MeanAbsoluteDeviation	5	0.208333	55	0.572917	60	0.5
T2w TSE	426	ngtdm	ngtdm_Complexity	4	0.166667	56	0.583333	60	0.5
T1w TSE	426	firstorder	firstorder_RobustMeanAbsoluteDeviation	4	0.166667	56	0.583333	60	0.5
T1w TSE	429	glrlm	glrlm_ShortRunLowGrayLevelEmphasis	5	0.208333	54	0.5625	59	0.491667
T1w TSE	429	glcm	glcm_JointEntropy	4	0.166667	55	0.572917	59	0.491667
HASTE	429	glszm	glszm_SizeZoneNonUniformityNormalized	0	0	59	0.614583	59	0.491667
HASTE	429	glszm	glszm_SmallAreaEmphasis	0	0	59	0.614583	59	0.491667
FLAIR	433	ngtdm	ngtdm_Strength	8	0.333333	50	0.520833	58	0.483333
T1w TSE	433	ngtdm	ngtdm_Contrast	5	0.208333	53	0.552083	58	0.483333
T1w TSE	433	glcm	glcm_JointEnergy	3	0.125	55	0.572917	58	0.483333
T1w TSE	433	glszm	glszm_LargeAreaHighGrayLevelEmphasis	3	0.125	55	0.572917	58	0.483333
T2w TSE	437	gldm	gldm_DependenceEntropy	9	0.375	48	0.5	57	0.475
T1w TSE	437	glszm	glszm_GrayLevelVariance	9	0.375	48	0.5	57	0.475
T1w TSE	437	glrlm	glrlm_GrayLevelNonUniformityNormalized	7	0.291667	50	0.520833	57	0.475
T1w TSE	437	glcm	glcm_ClusterProminence	4	0.166667	53	0.552083	57	0.475
HASTE	437	glszm	glszm_ZoneEntropy	3	0.125	54	0.5625	57	0.475
FLAIR	442	gldm	gldm_SmallDependenceLowGrayLevelEmphasis	11	0.458333	45	0.46875	56	0.466667
T1w TSE	442	ngtdm	ngtdm_Complexity	9	0.375	47	0.489583	56	0.466667
T1w TSE	442	firstorder	firstorder_Kurtosis	5	0.208333	51	0.53125	56	0.466667
T1w TSE	442	glrlm	glrlm_GrayLevelVariance	4	0.166667	52	0.541667	56	0.466667
T1w TSE	442	glrlm	glrlm_RunLengthNonUniformity	4	0.166667	52	0.541667	56	0.466667
HASTE	442	ngtdm	ngtdm_Strength	1	0.0416667	55	0.572917	56	0.466667
HASTE	442	firstorder	firstorder_Maximum	1	0.0416667	55	0.572917	56	0.466667
T1w TSE	449	firstorder	firstorder_Uniformity	6	0.25	49	0.510417	55	0.458333
T1w TSE	449	glcm	glcm_Correlation	5	0.208333	50	0.520833	55	0.458333
T1w TSE	449	glcm	glcm_MCC	5	0.208333	50	0.520833	55	0.458333
T1w TSE	449	firstorder	firstorder_Variance	4	0.166667	51	0.53125	55	0.458333
T2 map	449	glrlm	glrlm_LowGrayLevelRunEmphasis	4	0.166667	51	0.53125	55	0.458333
FLAIR	449	gldm	gldm_DependenceNonUniformity	3	0.125	52	0.541667	55	0.458333
HASTE	449	ngtdm	ngtdm_Busyness	0	0	55	0.572917	55	0.458333
T2 map	456	ngtdm	ngtdm_Strength	8	0.333333	46	0.479167	54	0.45
T1w TSE	456	gldm	gldm_GrayLevelVariance	4	0.166667	50	0.520833	54	0.45
T2 map	456	glrlm	glrlm_ShortRunLowGrayLevelEmphasis	4	0.166667	50	0.520833	54	0.45
T1w TSE	459	firstorder	firstorder_Skewness	6	0.25	47	0.489583	53	0.441667
T2 map	459	gldm	gldm_LowGrayLevelEmphasis	4	0.166667	49	0.510417	53	0.441667
T1w TSE	461	shape	shape_Sphericity	3	0.125	49	0.510417	52	0.433333
HASTE	461	firstorder	firstorder_Kurtosis	2	0.0833333	50	0.520833	52	0.433333
T2w TSE	463	ngtdm	ngtdm_Coarseness	6	0.25	45	0.46875	51	0.425
T1w TSE	463	firstorder	firstorder_10Percentile	3	0.125	48	0.5	51	0.425
HASTE	463	firstorder	firstorder_Entropy	0	0	51	0.53125	51	0.425
HASTE	466	firstorder	firstorder_Uniformity	1	0.0416667	49	0.510417	50	0.416667
HASTE	466	firstorder	firstorder_Median	0	0	50	0.520833	50	0.416667
T1w TSE	468	glcm	glcm_SumSquares	6	0.25	43	0.447917	49	0.408333
T1w TSE	468	firstorder	firstorder_InterquartileRange	4	0.166667	45	0.46875	49	0.408333
FLAIR	468	glrlm	glrlm_RunLengthNonUniformity	3	0.125	46	0.479167	49	0.408333
HASTE	468	firstorder	firstorder_RootMeanSquared	0	0	49	0.510417	49	0.408333
HASTE	468	firstorder	firstorder_Mean	0	0	49	0.510417	49	0.408333
T1w TSE	473	shape	shape_SurfaceVolumeRatio	3	0.125	45	0.46875	48	0.4
T2w TSE	473	firstorder	firstorder_Minimum	0	0	48	0.5	48	0.4
HASTE	473	glcm	glcm_ClusterProminence	0	0	48	0.5	48	0.4
HASTE	476	firstorder	firstorder_90Percentile	0	0	47	0.489583	47	0.391667
HASTE	477	firstorder	firstorder_InterquartileRange	1	0.0416667	45	0.46875	46	0.383333
HASTE	477	firstorder	firstorder_10Percentile	1	0.0416667	45	0.46875	46	0.383333
HASTE	477	glcm	glcm_SumEntropy	0	0	46	0.479167	46	0.383333
HASTE	477	glcm	glcm_SumSquares	0	0	46	0.479167	46	0.383333
T2w TSE	481	glszm	glszm_ZoneEntropy	8	0.333333	37	0.385417	45	0.375
HASTE	481	gldm	gldm_GrayLevelVariance	0	0	45	0.46875	45	0.375
HASTE	481	glcm	glcm_ClusterTendency	0	0	45	0.46875	45	0.375
HASTE	481	glrlm	glrlm_GrayLevelNonUniformityNormalized	0	0	45	0.46875	45	0.375
HASTE	481	firstorder	firstorder_Variance	0	0	45	0.46875	45	0.375
T1w TSE	486	glszm	glszm_GrayLevelNonUniformityNormalized	8	0.333333	36	0.375	44	0.366667
T1w TSE	486	glcm	glcm_ClusterTendency	5	0.208333	39	0.40625	44	0.366667
T2w TSE	486	glszm	glszm_SizeZoneNonUniformity	2	0.0833333	42	0.4375	44	0.366667
HASTE	486	firstorder	firstorder_RobustMeanAbsoluteDeviation	1	0.0416667	43	0.447917	44	0.366667
T2w TSE	486	firstorder	firstorder_Energy	0	0	44	0.458333	44	0.366667
T2w TSE	486	firstorder	firstorder_TotalEnergy	0	0	44	0.458333	44	0.366667
T2 map	486	gldm	gldm_DependenceNonUniformity	0	0	44	0.458333	44	0.366667
T2 map	486	glszm	glszm_GrayLevelNonUniformity	0	0	44	0.458333	44	0.366667
T1w TSE	494	firstorder	firstorder_Entropy	4	0.166667	39	0.40625	43	0.358333
HASTE	494	firstorder	firstorder_MeanAbsoluteDeviation	0	0	43	0.447917	43	0.358333
T2 map	496	shape	shape_Sphericity	0	0	42	0.4375	42	0.35
HASTE	496	glrlm	glrlm_GrayLevelVariance	0	0	42	0.4375	42	0.35
T1w TSE	498	firstorder	firstorder_Maximum	8	0.333333	32	0.333333	40	0.333333
HASTE	498	ngtdm	ngtdm_Coarseness	4	0.166667	36	0.375	40	0.333333
T1w TSE	500	gldm	gldm_DependenceEntropy	3	0.125	36	0.375	39	0.325
T1w TSE	501	glcm	glcm_SumEntropy	4	0.166667	34	0.354167	38	0.316667
HASTE	501	glrlm	glrlm_RunEntropy	2	0.0833333	36	0.375	38	0.316667
T2 map	503	ngtdm	ngtdm_Coarseness	4	0.166667	33	0.34375	37	0.308333
HASTE	504	glszm	glszm_GrayLevelNonUniformity	2	0.0833333	31	0.322917	33	0.275
T2w TSE	505	glszm	glszm_GrayLevelNonUniformity	1	0.0416667	24	0.25	25	0.208333
T2w TSE	505	shape	shape_Flatness	0	0	25	0.260417	25	0.208333
T2w TSE	507	shape	shape_Sphericity	0	0	23	0.239583	23	0.191667
FLAIR	507	glszm	glszm_GrayLevelNonUniformity	0	0	23	0.239583	23	0.191667
HASTE	509	shape	shape_Sphericity	0	0	22	0.229167	22	0.183333
HASTE	509	shape	shape_Flatness	0	0	22	0.229167	22	0.183333
FLAIR	511	shape	shape_Flatness	0	0	21	0.21875	21	0.175
HASTE	511	glrlm	glrlm_RunLengthNonUniformity	0	0	21	0.21875	21	0.175
T2w TSE	513	shape	shape_SurfaceVolumeRatio	0	0	20	0.208333	20	0.166667
T1w TSE	513	shape	shape_Flatness	0	0	20	0.208333	20	0.166667
FLAIR	513	shape	shape_Sphericity	0	0	20	0.208333	20	0.166667
HASTE	516	gldm	gldm_DependenceEntropy	3	0.125	16	0.166667	19	0.158333
T2w TSE	517	glrlm	glrlm_RunLengthNonUniformity	0	0	16	0.166667	16	0.133333
T1w TSE	518	glszm	glszm_GrayLevelNonUniformity	0	0	14	0.145833	14	0.116667
FLAIR	518	shape	shape_SurfaceVolumeRatio	0	0	14	0.145833	14	0.116667
HASTE	518	shape	shape_SurfaceVolumeRatio	0	0	14	0.145833	14	0.116667
T2 map	521	shape	shape_Flatness	0	0	12	0.125	12	0.1
T2 map	521	glrlm	glrlm_RunLengthNonUniformity	0	0	12	0.125	12	0.1
T1w TSE	523	glszm	glszm_SizeZoneNonUniformity	1	0.0416667	10	0.104167	11	0.0916667
HASTE	523	gldm	gldm_DependenceNonUniformity	1	0.0416667	10	0.104167	11	0.0916667
T1w TSE	525	firstorder	firstorder_Energy	0	0	8	0.0833333	8	0.0666667
T1w TSE	525	firstorder	firstorder_TotalEnergy	0	0	8	0.0833333	8	0.0666667
HASTE	527	firstorder	firstorder_Energy	0	0	6	0.0625	6	0.05
HASTE	527	firstorder	firstorder_TotalEnergy	0	0	6	0.0625	6	0.05
T2w TSE	529	gldm	gldm_DependenceNonUniformity	0	0	4	0.0416667	4	0.0333333
T2 map	530	shape	shape_SurfaceVolumeRatio	0	0	3	0.03125	3	0.025
T2w TSE	531	shape	shape_LeastAxisLength	0	0	0	0	0	0
T1w TSE	531	shape	shape_LeastAxisLength	0	0	0	0	0	0
FLAIR	531	shape	shape_LeastAxisLength	0	0	0	0	0	0
T2 map	531	shape	shape_LeastAxisLength	0	0	0	0	0	0
HASTE	531	shape	shape_LeastAxisLength	0	0	0	0	0	0
